# Supplementary material for: Thiol-to-amine cyclization reaction enables screening of large libraries of macrocyclic compounds and the generation of sub-kilodalton ligands
Source: PubMed Central journal article supplement — Sci Adv. 2019 Aug 21;5(8):eaaw2851. doi: 10.1126/sciadv.aaw2851 (PMC6703864; doi:10.1126/sciadv.aaw2851), 2019-08-21
Supplement: aaw2851_Data_S1.pdf [file aaw2851_Data_S1.pdf]

## Supplementary Data 1

### **Thiol-to-amine cyclization reaction enables screening of large libraries of macrocyclic compounds and the generation of sub-kDa ligands**

Sangram S. Kale<sup>1,5</sup>, Milan Bergeron-Brlek<sup>1,5</sup>, Yuteng Wu<sup>1,5</sup>, Mothukuri Ganesh Kumar<sup>1,5</sup>, Manh V. Pham<sup>1</sup>, Julien B. Chapalay<sup>2</sup>, Jonathan Vesin<sup>2</sup>, Xu-Dong Kong<sup>1</sup>, João Franco Machado<sup>1</sup>, Kaycie Deyle<sup>1</sup>, Patrick Gonschorek<sup>1</sup>, Gerardo Turcatti<sup>2</sup>, Laura Cendron<sup>3</sup>, Alessandro Angelini<sup>4</sup>, and Christian Heinis<sup>1\*</sup>

Correspondence to: christian.heinis@epfl.ch

## 2,6-bis(bromomethyl)pyridine (1)

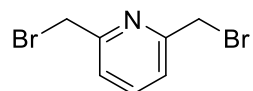

| peptide                   | substrate | product | side products                   |                                         |                                                      |                      |                 |                |
|---------------------------|-----------|---------|---------------------------------|-----------------------------------------|------------------------------------------------------|----------------------|-----------------|----------------|
|                           |           |         | linear peptide-linker conjugate | linear peptide-linker conjugate with OH | linear peptide-linker conjugate with NH <sub>2</sub> | linear peptide dimer | other           | not identified |
| Gly-Cys-R                 | -         | 96      | -                               | -                                       | -                                                    | 4                    | -               | -              |
| Ala-Cys-R                 | -         | 96      | -                               | -                                       | -                                                    | 4                    | -               | -              |
| D-Ala-Cys-R               | -         | 73      | 24                              | -                                       | -                                                    | 3                    | -               | -              |
| Val-Cys-R                 | -         | 96      | -                               | -                                       | -                                                    | 4                    | -               | -              |
| β-Ala-Cys-R               | -         | 81      | 14                              | -                                       | -                                                    | 5                    | -               | -              |
| Pro-Cys-R                 | -         | 96      | -                               | -                                       | -                                                    | 4                    | -               | -              |
| Phe-Cys-R                 | -         | 96      | -                               | -                                       | -                                                    | 4                    | -               | -              |
| Thr-Cys-R                 | -         | 93      | -                               | -                                       | -                                                    | 4                    | -               | 3              |
| Asn-Cys-R                 | -         | 92      | -                               | -                                       | -                                                    | 4                    | -               | 3              |
| Met-Cys-R                 | -         | 12      | -                               | -                                       | -                                                    | -                    | 74 <sup>e</sup> | 14             |
| Tyr-Cys-R                 | -         | 95      | -                               | -                                       | -                                                    | 5                    | -               | -              |
| Glu-Cys-R                 | -         | 94      | -                               | -                                       | -                                                    | 6                    | -               | -              |
| Gly-HCys-R <sub>1</sub>   | -         | 100     | -                               | -                                       | -                                                    | -                    | -               | -              |
| Gly-Mnv- R <sub>1</sub>   | -         | 96      | -                               | -                                       | -                                                    | 4                    | -               | -              |
| Gly-NMeCys-R <sub>1</sub> | -         | 87      | -                               | -                                       | -                                                    | -                    | 13 <sup>c</sup> | -              |
| (Gly) <sub>2</sub> -Cys-R | -         | 96      | -                               | -                                       | -                                                    | 4                    | -               | -              |
| (Gly) <sub>3</sub> -Cys-R | -         | 61      | 15                              | -                                       | -                                                    | 4                    | -               | 19             |
| (Gly) <sub>4</sub> -Cys-R | -         | 61      | 32                              | -                                       | -                                                    | 3                    | -               | 4              |
| (Gly) <sub>5</sub> -Cys-R | -         | 89      | 5                               | -                                       | 4                                                    | 2                    | -               | -              |

LC-MS analysis of Gly-Cys-R macrocyclization:

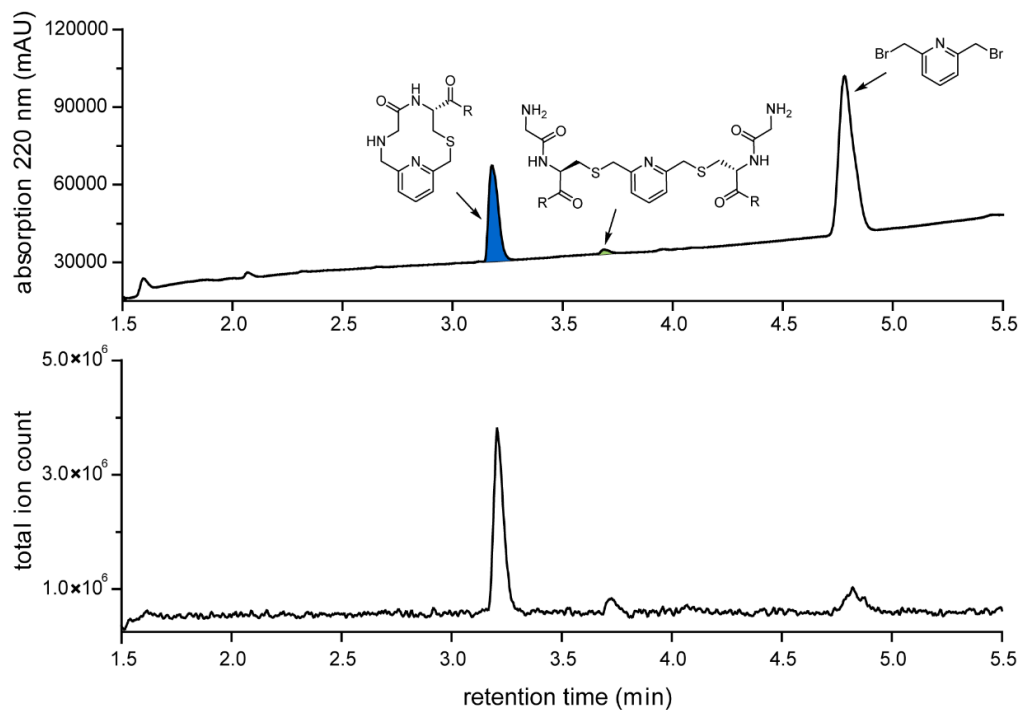

## 1,2-bis(bromomethyl)benzene (2)

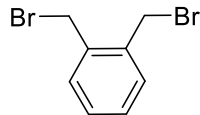

| peptide                   | substrate<br>not modified peptide | product<br>cyclic peptide | side products                   |                                         |                                                      |                      |                                   | other | not identified |
|---------------------------|-----------------------------------|---------------------------|---------------------------------|-----------------------------------------|------------------------------------------------------|----------------------|-----------------------------------|-------|----------------|
|                           |                                   |                           | linear peptide-linker conjugate | linear peptide-linker conjugate with OH | linear peptide-linker conjugate with NH <sub>2</sub> | linear peptide dimer |                                   |       |                |
| Gly-Cys-R                 | -                                 | 16                        | -                               | 4                                       | -                                                    | -                    | 66 <sup>a</sup>                   | 14    |                |
| Ala-Cys-R                 | -                                 | 39                        | -                               | -                                       | -                                                    | -                    | 44 <sup>a</sup> , 6 <sup>b</sup>  | 11    |                |
| D-Ala-Cys-R               | -                                 | 34                        | -                               | -                                       | -                                                    | -                    | 54 <sup>a</sup> , 2 <sup>b</sup>  | 10    |                |
| Val-Cys-R                 | -                                 | 48                        | -                               | -                                       | -                                                    | -                    | 46 <sup>a</sup> , 3 <sup>b</sup>  | 2     |                |
| $\beta$ -Ala-Cys-R        | -                                 | 52                        | -                               | -                                       | -                                                    | -                    | 23 <sup>a</sup> , 4 <sup>b</sup>  | 20    |                |
| Pro-Cys-R                 | -                                 | 51                        | -                               | 3                                       | -                                                    | -                    | 41 <sup>a</sup> , 5 <sup>b</sup>  | -     |                |
| Phe-Cys-R                 | -                                 | 34                        | -                               | -                                       | -                                                    | -                    | 26 <sup>a</sup>                   | 41    |                |
| Thr-Cys-R                 | -                                 | 41                        | -                               | -                                       | -                                                    | -                    | 45 <sup>a</sup> , 6 <sup>b</sup>  | 8     |                |
| Asn-Cys-R                 | -                                 | 40                        | -                               | 4                                       | -                                                    | -                    | 45 <sup>a</sup> , 2 <sup>b</sup>  | 9     |                |
| Met-Cys-R                 | -                                 | -                         | -                               | -                                       | -                                                    | -                    | 100 <sup>c</sup>                  | -     |                |
| Tyr-Cys-R                 | -                                 | 56                        | -                               | -                                       | -                                                    | -                    | 41 <sup>a</sup>                   | 3     |                |
| Glu-Cys-R                 | -                                 | 56                        | -                               | -                                       | -                                                    | -                    | 44 <sup>a</sup>                   | -     |                |
| Gly-HCys-R <sub>1</sub>   | -                                 | 4                         | -                               | 46                                      | -                                                    | -                    | 9 <sup>b</sup> , 40 <sup>h</sup>  | -     |                |
| Gly-Mnv-R <sub>1</sub>    | -                                 | 3                         | -                               | 9                                       | -                                                    | -                    | 23 <sup>b</sup> , 65 <sup>h</sup> | -     |                |
| Gly-NMeCys-R <sub>1</sub> | 4                                 | 38                        | -                               | 42                                      | -                                                    | 16                   | -                                 | -     |                |
| (Gly) <sub>2</sub> -Cys-R | -                                 | 17                        | -                               | 8                                       | -                                                    | -                    | 59 <sup>a</sup>                   | 17    |                |
| (Gly) <sub>3</sub> -Cys-R | -                                 | 29                        | -                               | 5                                       | -                                                    | -                    | 40 <sup>a</sup> , 11 <sup>b</sup> | 15    |                |
| (Gly) <sub>4</sub> -Cys-R | -                                 | 55                        | -                               | 4                                       | -                                                    | -                    | 34 <sup>a</sup>                   | 7     |                |
| (Gly) <sub>5</sub> -Cys-R | -                                 | 48                        | -                               | 4                                       | -                                                    | -                    | 38 <sup>a</sup>                   | 9     |                |

LC-MS analysis of Gly-Cys-R macrocyclization:

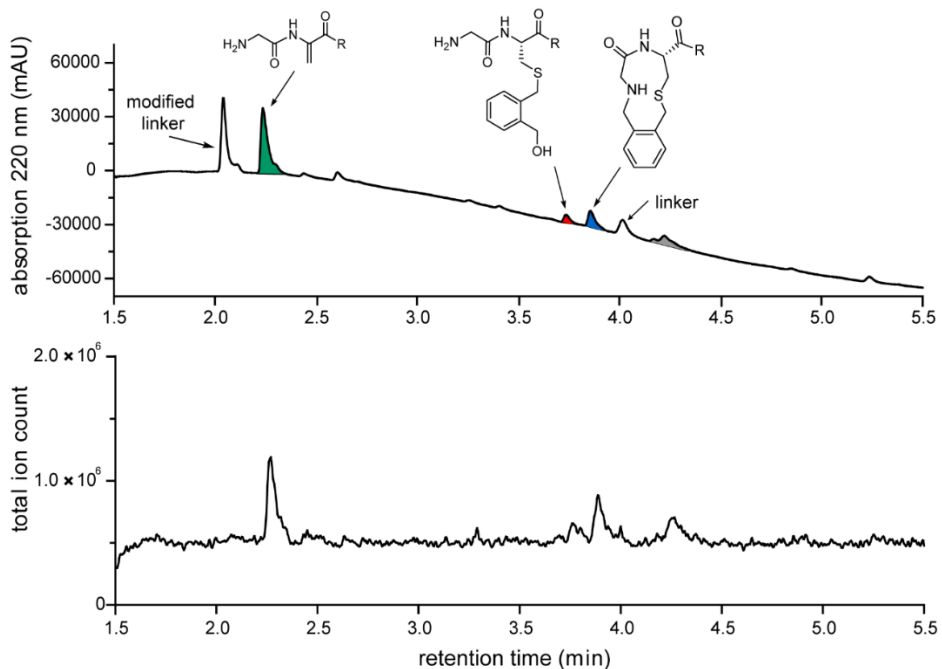

### 1,4-bis(bromomethyl)benzene (3)

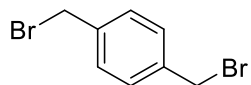

| peptide                   | substrate<br>not modified<br>peptide | product<br>cyclic peptide | side products                          |                                                   |                                                                |                         |                 | other | not<br>identified |
|---------------------------|--------------------------------------|---------------------------|----------------------------------------|---------------------------------------------------|----------------------------------------------------------------|-------------------------|-----------------|-------|-------------------|
|                           |                                      |                           | linear peptide-<br>linker<br>conjugate | linear peptide-<br>linker<br>conjugate with<br>OH | linear peptide-<br>linker<br>conjugate with<br>NH <sub>2</sub> | linear peptide<br>dimer |                 |       |                   |
| Gly-Cys-R                 | -                                    | 79                        | -                                      | -                                                 | 2                                                              | 13                      | -               | 6     |                   |
| Ala-Cys-R                 | -                                    | 83                        | -                                      | -                                                 | 3                                                              | 14                      | -               | -     |                   |
| D-Ala-Cys-R               | -                                    | 32                        | 5                                      | 17                                                | 3                                                              | 35                      | -               | 8     |                   |
| Val-Cys-R                 | -                                    | 70                        | -                                      | 5                                                 | 1                                                              | 21                      | -               | 3     |                   |
| β-Ala-Cys-R               | -                                    | 45                        | -                                      | 15                                                | 2                                                              | 19                      | -               | 19    |                   |
| Pro-Cys-R                 | -                                    | 98                        | -                                      | -                                                 | -                                                              | 2                       | -               | -     |                   |
| Phe-Cys-R                 | -                                    | 73                        | -                                      | 3                                                 | 2                                                              | 18                      | -               | 4     |                   |
| Thr-Cys-R                 | -                                    | 83                        | -                                      | -                                                 | -                                                              | 17                      | -               | -     |                   |
| Asn-Cys-R                 | -                                    | 79                        | -                                      | 3                                                 | 2                                                              | 16                      | -               | -     |                   |
| Met-Cys-R                 | -                                    | 7                         | -                                      | 2                                                 | -                                                              | 10                      | 81 <sup>e</sup> | -     |                   |
| Tyr-Cys-R                 | -                                    | 72                        | -                                      | 3                                                 | 1                                                              | 16                      | -               | 8     |                   |
| Glu-Cys-R                 | -                                    | 86                        | -                                      | 2                                                 | 1                                                              | 11                      | -               | -     |                   |
| Gly-HCys-R <sub>1</sub>   | 23                                   | 58                        | -                                      | 12                                                | -                                                              | -                       | 2 <sup>b</sup>  | 4, 1  |                   |
| Gly-Mnv- R <sub>1</sub>   | 53                                   | 13                        | -                                      | 34                                                | -                                                              | -                       | -               | -     |                   |
| Gly-NMeCys-R <sub>1</sub> | 9                                    | 51                        | -                                      | -                                                 | -                                                              | 24                      | -               | 16    |                   |
| (Gly) <sub>2</sub> -Cys-R | -                                    | 30                        | -                                      | 16                                                | 3                                                              | 33                      | -               | 18    |                   |
| (Gly) <sub>3</sub> -Cys-R | -                                    | 26                        | -                                      | 12                                                | 3                                                              | 37                      | -               | 22    |                   |
| (Gly) <sub>4</sub> -Cys-R | -                                    | 49                        | -                                      | 7                                                 | 3                                                              | 27                      | -               | 14    |                   |
| (Gly) <sub>5</sub> -Cys-R | -                                    | 44                        | -                                      | 14                                                | 3                                                              | 30                      | -               | 9     |                   |

LC-MS analysis of Gly-Cys-R macrocyclization:

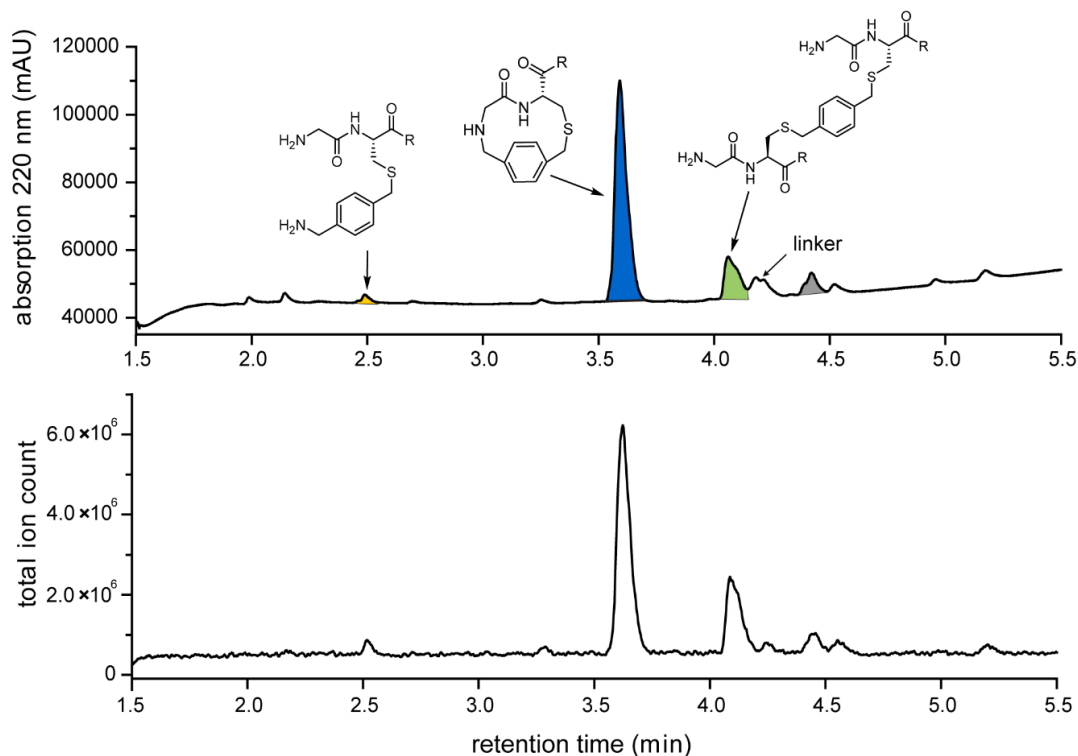

## Divinyl sulfone (4)

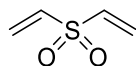

| peptide                   | substrate<br>not modified peptide | product<br>cyclic peptide | side products                   |                                         |                                                      |                      |                                  |                |
|---------------------------|-----------------------------------|---------------------------|---------------------------------|-----------------------------------------|------------------------------------------------------|----------------------|----------------------------------|----------------|
|                           |                                   |                           | linear peptide-linker conjugate | linear peptide-linker conjugate with OH | linear peptide-linker conjugate with NH <sub>2</sub> | linear peptide dimer | other                            | not identified |
| Gly-Cys-R                 | -                                 | 74                        | 2                               | -                                       | 12                                                   | -                    | 12 <sup>c</sup>                  | -              |
| Ala-Cys-R                 | -                                 | 85                        | 2                               | -                                       | 11                                                   | 2                    | -                                | -              |
| D-Ala-Cys-R               | -                                 | 54                        | 20                              | -                                       | 26                                                   | -                    | -                                | -              |
| Val-Cys-R                 | -                                 | 72                        | 8                               | -                                       | 19                                                   | 1                    | -                                | -              |
| β-Ala-Cys-R               | -                                 | 100                       | -                               | -                                       | -                                                    | -                    | -                                | -              |
| Pro-Cys-R                 | -                                 | 100                       | -                               | -                                       | -                                                    | -                    | -                                | -              |
| Phe-Cys-R                 | -                                 | 65                        | -                               | -                                       | 15                                                   | 4                    | 11 <sup>d</sup> , 5 <sup>c</sup> | -              |
| Thr-Cys-R                 | -                                 | 52                        | 10                              | -                                       | 29                                                   | 2                    | 5 <sup>d</sup> , 2 <sup>c</sup>  | -              |
| Asn-Cys-R                 | -                                 | 24                        | 24                              | -                                       | 42                                                   | 4                    | 6 <sup>c</sup>                   | -              |
| Met-Cys-R                 | -                                 | 65                        | -                               | -                                       | 26                                                   | 6                    | 3 <sup>b</sup>                   | -              |
| Tyr-Cys-R                 | -                                 | 62                        | -                               | -                                       | 16                                                   | 7                    | 4 <sup>d</sup> , 3 <sup>c</sup>  | 8              |
| Glu-Cys-R                 | -                                 | 79                        | -                               | -                                       | 7                                                    | 1                    | 5 <sup>c</sup>                   | 7              |
| Gly-HCys-R <sub>1</sub>   | -                                 | 26                        | 17                              | -                                       | -                                                    | -                    | 16 <sup>c</sup>                  | 35, 7          |
| Gly-Mnv- R <sub>1</sub>   | -                                 | 60                        | 5                               | -                                       | -                                                    | -                    | 3 <sup>d</sup>                   | 16, 9, 7       |
| Gly-NMeCys-R <sub>1</sub> | -                                 | 41                        | 21                              | -                                       | -                                                    | -                    | 7 <sup>d</sup> , 5 <sup>c</sup>  | 27             |
| (Gly) <sub>2</sub> -Cys-R | -                                 | 97                        | -                               | -                                       | 3                                                    | -                    | -                                | -              |
| (Gly) <sub>3</sub> -Cys-R | -                                 | 95                        | -                               | -                                       | 2                                                    | 3                    | -                                | -              |
| (Gly) <sub>4</sub> -Cys-R | -                                 | 97                        | -                               | -                                       | 1                                                    | 2                    | -                                | -              |
| (Gly) <sub>5</sub> -Cys-R | -                                 | 98                        | -                               | -                                       | 2                                                    | -                    | -                                | -              |

LC-MS analysis of Gly-Cys-R macrocyclization:

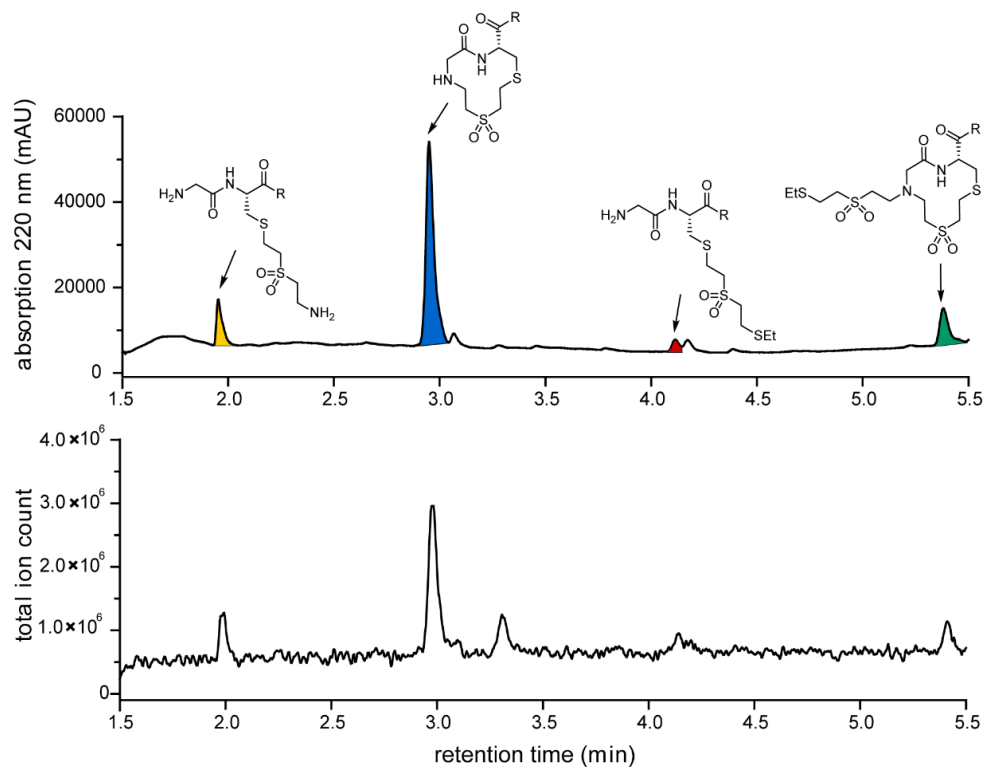

## Bis(vinyl sulfonyl)methane (5)

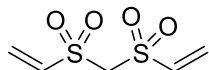

| peptide                   | substrate<br>not modified<br>peptide | product<br>cyclic peptide | side products                          |                                                   |                                                                |                         |                 |                   |
|---------------------------|--------------------------------------|---------------------------|----------------------------------------|---------------------------------------------------|----------------------------------------------------------------|-------------------------|-----------------|-------------------|
|                           |                                      |                           | linear peptide-<br>linker<br>conjugate | linear peptide-<br>linker<br>conjugate with<br>OH | linear peptide-<br>linker<br>conjugate with<br>NH <sub>2</sub> | linear peptide<br>dimer | other           | not<br>identified |
| Gly-Cys-R                 | -                                    | 80                        | -                                      | -                                                 | 2                                                              | 2                       | 10 <sup>d</sup> | 6                 |
| Ala-Cys-R                 | -                                    | 73                        | -                                      | -                                                 | 2                                                              | 3                       | 17 <sup>d</sup> | 5                 |
| D-Ala-Cys-R               | -                                    | 47                        | -                                      | -                                                 | 16                                                             | 5                       | 23 <sup>d</sup> | 9                 |
| Val-Cys-R                 | -                                    | 83                        | -                                      | -                                                 | 3                                                              | 4                       | 7 <sup>d</sup>  | 3                 |
| β-Ala-Cys-R               | -                                    | 86                        | -                                      | -                                                 | -                                                              | -                       | 4 <sup>d</sup>  | 10                |
| Pro-Cys-R                 | -                                    | 93                        | -                                      | -                                                 | -                                                              | -                       | 4 <sup>d</sup>  | 3                 |
| Phe-Cys-R                 | -                                    | 82                        | -                                      | -                                                 | 3                                                              | 7                       | 4 <sup>d</sup>  | 4                 |
| Thr-Cys-R                 | -                                    | 86                        | -                                      | -                                                 | 8                                                              | 4                       | -               | 2                 |
| Asn-Cys-R                 | -                                    | 69                        | -                                      | -                                                 | 13                                                             | 8                       | 8 <sup>d</sup>  | 2                 |
| Met-Cys-R                 | -                                    | 79                        | -                                      | -                                                 | 5                                                              | 7                       | 6 <sup>d</sup>  | 3                 |
| Tyr-Cys-R                 | -                                    | 89                        | -                                      | -                                                 | 3                                                              | -                       | 5 <sup>d</sup>  | 3                 |
| Glu-Cys-R                 | -                                    | 95                        | -                                      | -                                                 | -                                                              | -                       | -               | 5                 |
| Gly-HCys-R <sub>1</sub>   | -                                    | 83                        | -                                      | -                                                 | -                                                              | 6                       | 2 <sup>d</sup>  | 5, 4              |
| Gly-Mnv- R <sub>1</sub>   | -                                    | 91                        | 4                                      | -                                                 | -                                                              | 2                       | 3 <sup>d</sup>  | -                 |
| Gly-NMeCys-R <sub>1</sub> | -                                    | 80                        | -                                      | -                                                 | -                                                              | 3                       | -               | 10, 7             |
| (Gly) <sub>2</sub> -Cys-R | -                                    | 87                        | -                                      | -                                                 | 1                                                              | 3                       | 1 <sup>d</sup>  | 8                 |
| (Gly) <sub>3</sub> -Cys-R | -                                    | 93                        | -                                      | -                                                 | -                                                              | -                       | -               | 7                 |
| (Gly) <sub>4</sub> -Cys-R | -                                    | 93                        | -                                      | -                                                 | -                                                              | -                       | -               | 7                 |
| (Gly) <sub>5</sub> -Cys-R | -                                    | 95                        | -                                      | -                                                 | -                                                              | -                       | -               | 5                 |

LC-MS analysis of Gly-Cys-R macrocyclization:

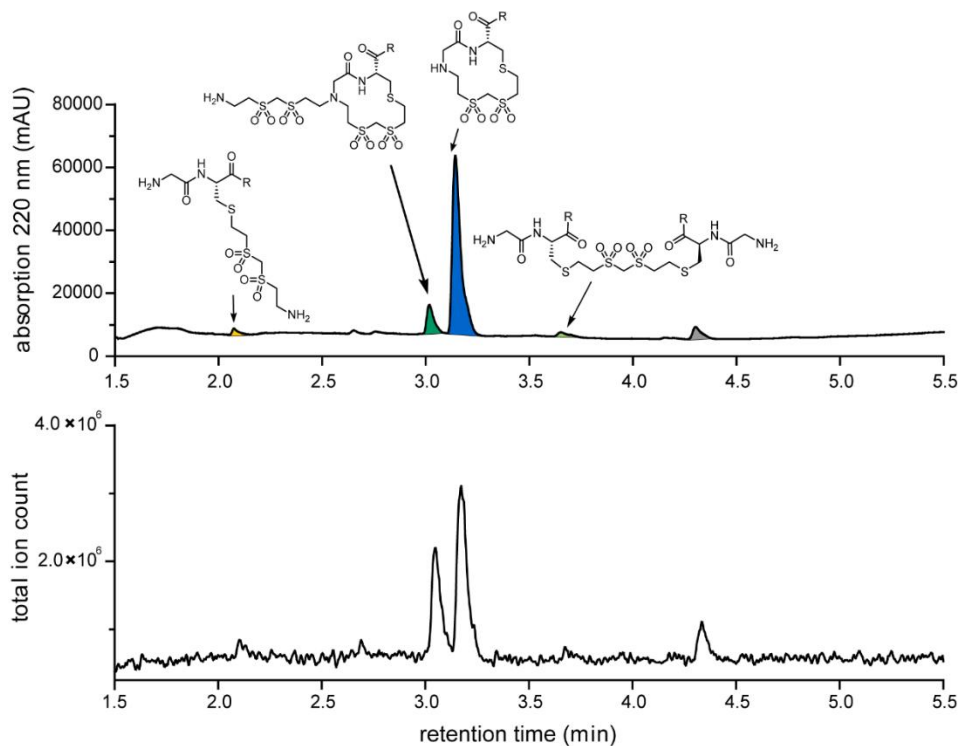

## 2,4-dichloro-1,3,5-triazine (6)

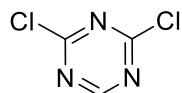

| peptide                   | substrate<br>not modified<br>peptide | product<br>cyclic peptide | side products                          |                                                   |                                                                |                         |                 | other       | not identified |
|---------------------------|--------------------------------------|---------------------------|----------------------------------------|---------------------------------------------------|----------------------------------------------------------------|-------------------------|-----------------|-------------|----------------|
|                           |                                      |                           | linear peptide-<br>linker<br>conjugate | linear peptide-<br>linker<br>conjugate with<br>OH | linear peptide-<br>linker<br>conjugate with<br>NH <sub>2</sub> | linear peptide<br>dimer |                 |             |                |
| Gly-Cys-R                 | -                                    | 77                        | -                                      | -                                                 | 3                                                              | -                       | 5 <sup>g</sup>  | 15          |                |
| Ala-Cys-R                 | -                                    | 86                        | -                                      | -                                                 | -                                                              | -                       | -               | 14          |                |
| D-Ala-Cys-R               | -                                    | 88                        | -                                      | -                                                 | -                                                              | -                       | -               | 12          |                |
| Val-Cys-R                 | -                                    | 88                        | -                                      | -                                                 | -                                                              | -                       | -               | 12          |                |
| β-Ala-Cys-R               | -                                    | 78                        | -                                      | -                                                 | -                                                              | -                       | 7 <sup>g</sup>  | 15          |                |
| Pro-Cys-R                 | -                                    | 38                        | -                                      | -                                                 | -                                                              | -                       | 43 <sup>g</sup> | 19          |                |
| Phe-Cys-R                 | -                                    | 72                        | -                                      | -                                                 | -                                                              | -                       | -               | 28          |                |
| Thr-Cys-R                 | -                                    | 81                        | -                                      | -                                                 | -                                                              | -                       | 5 <sup>b</sup>  | 15          |                |
| Asn-Cys-R                 | -                                    | 77                        | -                                      | 1                                                 | 5                                                              | -                       | -               | 16          |                |
| Met-Cys-R                 | -                                    | 87                        | -                                      | -                                                 | -                                                              | -                       | -               | 13          |                |
| Tyr-Cys-R                 | -                                    | 86                        | -                                      | -                                                 | -                                                              | -                       | -               | 14          |                |
| Glu-Cys-R                 | -                                    | 84                        | -                                      | -                                                 | -                                                              | -                       | -               | 16          |                |
| Gly-HCys-R <sub>1</sub>   | -                                    | 93                        | -                                      | -                                                 | -                                                              | -                       | -               | 4, 3        |                |
| Gly-Mnv- R <sub>1</sub>   | -                                    | 76                        | -                                      | -                                                 | -                                                              | -                       | -               | 14, 10      |                |
| Gly-NMeCys-R <sub>1</sub> | -                                    | 64                        | -                                      | -                                                 | -                                                              | -                       | -               | 22, 6, 5, 3 |                |
| (Gly) <sub>2</sub> -Cys-R | -                                    | 86                        | -                                      | -                                                 | -                                                              | -                       | -               | 14          |                |
| (Gly) <sub>3</sub> -Cys-R | -                                    | 87                        | -                                      | -                                                 | -                                                              | -                       | -               | 13          |                |
| (Gly) <sub>4</sub> -Cys-R | -                                    | 86                        | -                                      | -                                                 | -                                                              | -                       | -               | 14          |                |
| (Gly) <sub>5</sub> -Cys-R | -                                    | 88                        | -                                      | -                                                 | -                                                              | -                       | -               | 12          |                |

LC-MS analysis of Gly-Cys-R cyclization:

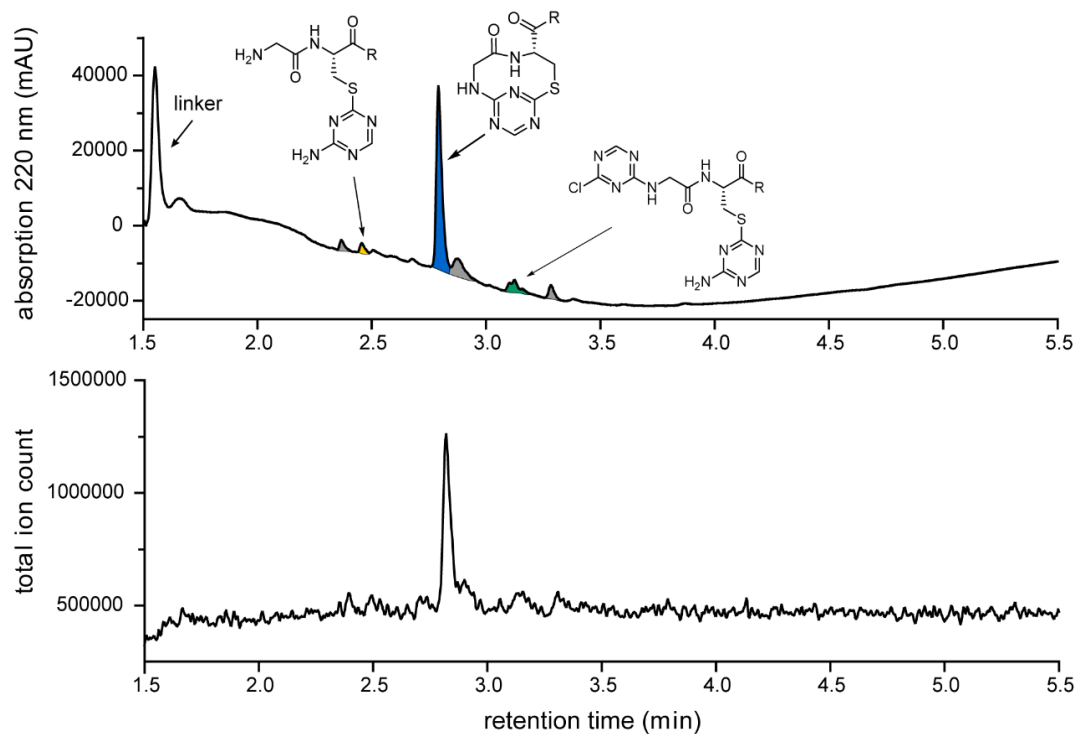

## 1,4-bis(bromomethyl)-2,3,5,6-tetrafluorobenzene (7)

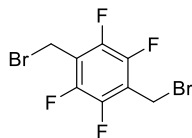

| peptide                   | substrate<br>not modified peptide | product<br>cyclic peptide | side products                   |                                         |                                                      |                      |                 | other | not identified |
|---------------------------|-----------------------------------|---------------------------|---------------------------------|-----------------------------------------|------------------------------------------------------|----------------------|-----------------|-------|----------------|
|                           |                                   |                           | linear peptide-linker conjugate | linear peptide-linker conjugate with OH | linear peptide-linker conjugate with NH <sub>2</sub> | linear peptide dimer |                 |       |                |
| Gly-Cys-R                 | -                                 | 85                        | -                               | -                                       | -                                                    | 15                   | -               | -     |                |
| Ala-Cys-R                 | -                                 | 89                        | -                               | -                                       | -                                                    | 11                   | -               | -     |                |
| D-Ala-Cys-R               | -                                 | 49                        | 19                              | 4                                       | 9                                                    | 19                   | -               | -     |                |
| Val-Cys-R                 | -                                 | 91                        | -                               | -                                       | 1                                                    | 8                    | -               | -     |                |
| β-Ala-Cys-R               | -                                 | 71                        | 2                               | 2                                       | 12                                                   | 13                   | -               | -     |                |
| Pro-Cys-R                 | -                                 | 95                        | -                               | -                                       | -                                                    | 5                    | -               | -     |                |
| Phe-Cys-R                 | -                                 | 89                        | -                               | -                                       | 2                                                    | 9                    | -               | -     |                |
| Thr-Cys-R                 | -                                 | 88                        | -                               | -                                       | -                                                    | 12                   | -               | -     |                |
| Asn-Cys-R                 | -                                 | 85                        | -                               | -                                       | 2                                                    | 13                   | -               | -     |                |
| Met-Cys-R                 | -                                 | 39                        | -                               | -                                       | -                                                    | 12                   | 49 <sup>e</sup> | -     |                |
| Tyr-Cys-R                 | -                                 | 81                        | -                               | -                                       | -                                                    | 6                    | -               | 13    |                |
| Glu-Cys-R                 | -                                 | 92                        | -                               | -                                       | -                                                    | 8                    | -               | -     |                |
| Gly-HCys-R <sub>1</sub>   | -                                 | 97                        | -                               | -                                       | -                                                    | 3                    | -               | -     |                |
| Gly-Mnv- R <sub>1</sub>   | -                                 | 75                        | -                               | -                                       | -                                                    | 16                   | -               | 9     |                |
| Gly-NMeCys-R <sub>1</sub> | -                                 | 50                        | -                               | -                                       | -                                                    | 22                   | -               | 28    |                |
| (Gly) <sub>2</sub> -Cys-R | -                                 | 59                        | 13                              | 3                                       | 9                                                    | 16                   | -               | -     |                |
| (Gly) <sub>3</sub> -Cys-R | -                                 | 62                        | 5                               | 3                                       | 16                                                   | 14                   | -               | -     |                |
| (Gly) <sub>4</sub> -Cys-R | -                                 | 78                        | -                               | 2                                       | 7                                                    | 13                   | -               | -     |                |
| (Gly) <sub>5</sub> -Cys-R | -                                 | 78                        | 1                               | -                                       | 9                                                    | 12                   | -               | -     |                |

LC-MS analysis of Gly-Cys-R macrocyclization:

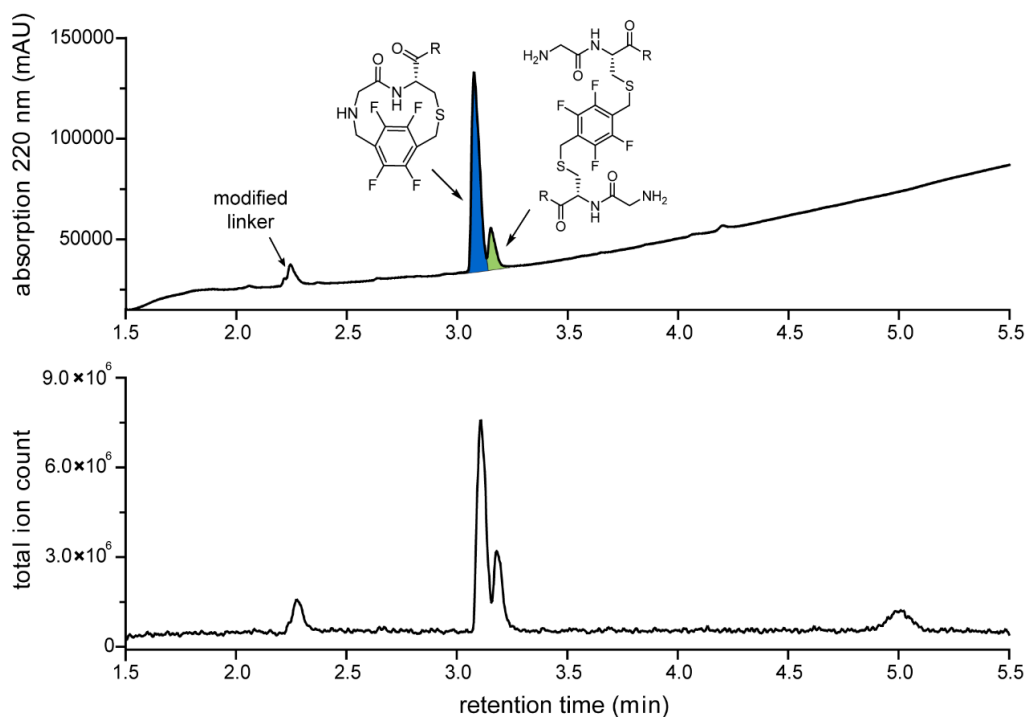



## 1,3-bis(bromomethyl)benzene (8)

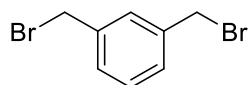

| peptide                   | substrate            | product        | side products                   |                                         |                                                      |                      |                 | not identified |
|---------------------------|----------------------|----------------|---------------------------------|-----------------------------------------|------------------------------------------------------|----------------------|-----------------|----------------|
|                           | not modified peptide | cyclic peptide | linear peptide-linker conjugate | linear peptide-linker conjugate with OH | linear peptide-linker conjugate with NH <sub>2</sub> | linear peptide dimer | other           |                |
| Gly-Cys-R                 | -                    | 86             | -                               | -                                       | 1                                                    | 13                   | -               | -              |
| Ala-Cys-R                 | -                    | 89             | -                               | -                                       | -                                                    | 11                   | -               | -              |
| D-Ala-Cys-R               | -                    | 69             | -                               | 9                                       | 3                                                    | 11                   | -               | 8              |
| Val-Cys-R                 | -                    | 98             | -                               | -                                       | -                                                    | 2                    | -               | -              |
| β-Ala-Cys-R               | -                    | 69             | -                               | 7                                       | 2                                                    | 16                   | -               | 6              |
| Pro-Cys-R                 | -                    | 97             | -                               | 1                                       | -                                                    | 2                    | -               | -              |
| Phe-Cys-R                 | -                    | 97             | -                               | -                                       | -                                                    | 3                    | -               | -              |
| Thr-Cys-R                 | -                    | 96             | -                               | -                                       | -                                                    | 4                    | -               | -              |
| Asn-Cys-R                 | -                    | 88             | -                               | -                                       | -                                                    | 12                   | -               | -              |
| Met-Cys-R                 | -                    | 9              | -                               | -                                       | -                                                    | -                    | 91 <sup>e</sup> | -              |
| Tyr-Cys-R                 | -                    | 96             | -                               | -                                       | -                                                    | 4                    | -               | -              |
| Glu-Cys-R                 | -                    | 96             | -                               | -                                       | -                                                    | 4                    | -               | -              |
| Gly-HCys-R <sub>1</sub>   | -                    | 58             | 37                              | -                                       | -                                                    | -                    | 5 <sup>b</sup>  | -              |
| Gly-Mnv-R <sub>1</sub>    | -                    | 45             | -                               | -                                       | -                                                    | -                    | 55 <sup>c</sup> | -              |
| Gly-NMeCys-R <sub>1</sub> | 4                    | 66             | -                               | -                                       | -                                                    | 8                    | -               | 20, 2          |
| (Gly) <sub>2</sub> -Cys-R | -                    | 43             | -                               | 15                                      | 5                                                    | 17                   | -               | 20             |
| (Gly) <sub>3</sub> -Cys-R | -                    | 53             | -                               | 6                                       | 3                                                    | 21                   | 2 <sup>a</sup>  | 15             |
| (Gly) <sub>4</sub> -Cys-R | -                    | 55             | -                               | 6                                       | 3                                                    | 17                   | 2 <sup>a</sup>  | 17             |
| (Gly) <sub>5</sub> -Cys-R | -                    | 79             | -                               | 8                                       | 4                                                    | 5                    | -               | 4              |

LC-MS analysis of Gly-Cys-R macrocyclization:

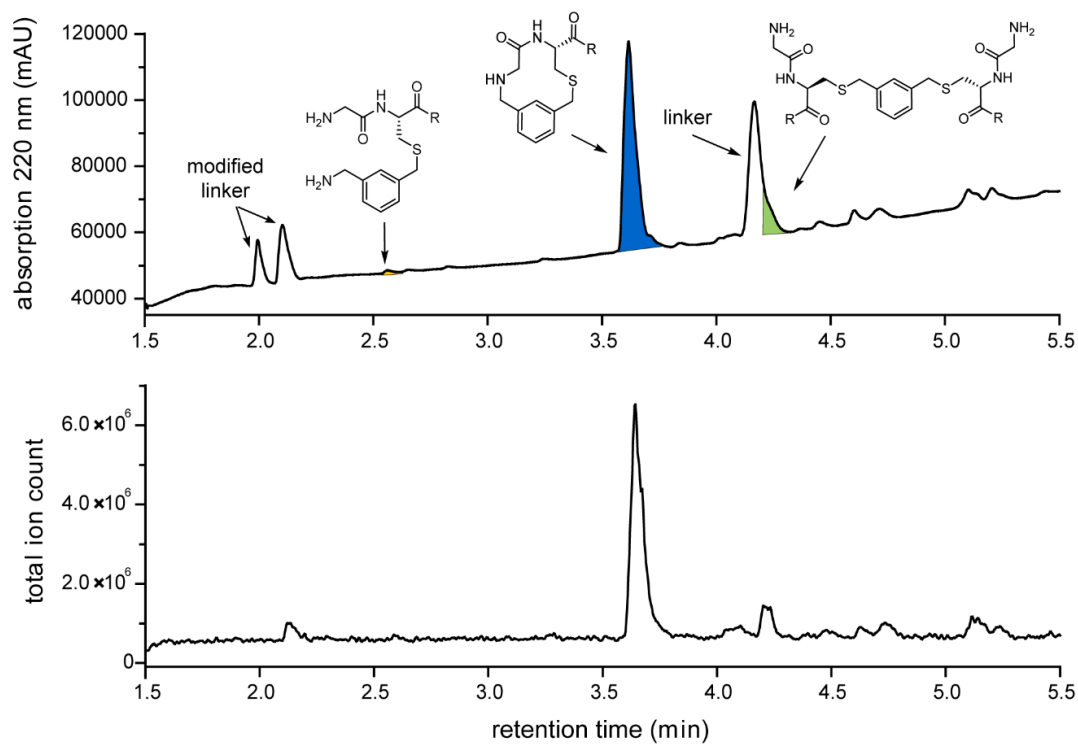

## 1-bromo-3,5-bis(bromomethyl)benzene (9)

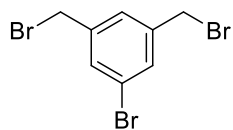

| peptide                   | substrate | product | side products                   |                                         |                                                      |                      |                 |                |
|---------------------------|-----------|---------|---------------------------------|-----------------------------------------|------------------------------------------------------|----------------------|-----------------|----------------|
|                           |           |         | linear peptide-linker conjugate | linear peptide-linker conjugate with OH | linear peptide-linker conjugate with NH <sub>2</sub> | linear peptide dimer | other           | not identified |
| Gly-Cys-R                 | -         | 89      | -                               | -                                       | -                                                    | 11                   | -               | -              |
| Ala-Cys-R                 | -         | 83      | -                               | -                                       | -                                                    | 12                   | 6 <sup>b</sup>  | -              |
| D-Ala-Cys-R               | -         | 73      | -                               | -                                       | -                                                    | 24                   | 3 <sup>a</sup>  | -              |
| Val-Cys-R                 | -         | 90      | -                               | -                                       | -                                                    | 10                   | -               | -              |
| β-Ala-Cys-R               | -         | 76      | -                               | -                                       | -                                                    | 24                   | -               | -              |
| Pro-Cys-R                 | -         | 100     | -                               | -                                       | -                                                    | -                    | -               | -              |
| Phe-Cys-R                 | -         | 90      | -                               | -                                       | -                                                    | 10                   | -               | -              |
| Thr-Cys-R                 | -         | 90      | -                               | -                                       | -                                                    | 10                   | -               | -              |
| Asn-Cys-R                 | -         | 88      | -                               | -                                       | -                                                    | 12                   | -               | -              |
| Met-Cys-R                 | -         | 22      | -                               | -                                       | -                                                    | 5                    | 73 <sup>c</sup> | -              |
| Tyr-Cys-R                 | -         | 91      | -                               | -                                       | -                                                    | 9                    | -               | -              |
| Glu-Cys-R                 | -         | 95      | -                               | -                                       | -                                                    | 5                    | -               | -              |
| Gly-HCys-R <sub>1</sub>   | 9         | 79      | -                               | -                                       | -                                                    | 4                    | -               | 5, 3           |
| Gly-Mnv- R <sub>1</sub>   | 21        | 56      | -                               | 10                                      | -                                                    | -                    | -               | 5, 5, 3        |
| Gly-NMeCys-R <sub>1</sub> | -         | 69      | -                               | -                                       | -                                                    | -                    | -               | 23, 5, 3       |
| (Gly) <sub>2</sub> -Cys-R | -         | 58      | -                               | -                                       | -                                                    | 28                   | -               | 14             |
| (Gly) <sub>3</sub> -Cys-R | -         | 76      | -                               | -                                       | -                                                    | 24                   | -               | -              |
| (Gly) <sub>4</sub> -Cys-R | -         | 76      | -                               | -                                       | -                                                    | 24                   | -               | -              |
| (Gly) <sub>5</sub> -Cys-R | -         | 77      | -                               | -                                       | 5                                                    | 18                   | -               | -              |

LC-MS analysis of Gly-Cys-R macrocyclization:

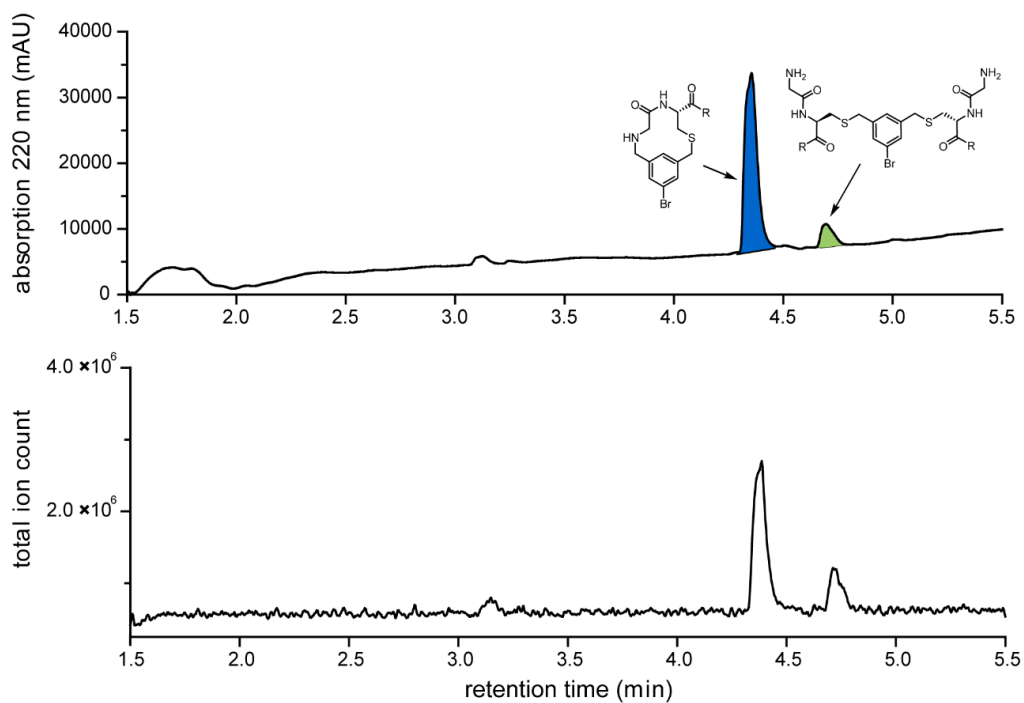

## Methyl 2,4-dichloropyrimidine-5-carboxylate (10)

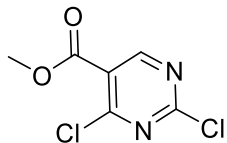

| peptide                   | substrate<br>not modified peptide | product<br>cyclic peptide | side products                   |                                         |                                                      |                      |                                   | other | not identified |
|---------------------------|-----------------------------------|---------------------------|---------------------------------|-----------------------------------------|------------------------------------------------------|----------------------|-----------------------------------|-------|----------------|
|                           |                                   |                           | linear peptide-linker conjugate | linear peptide-linker conjugate with OH | linear peptide-linker conjugate with NH <sub>2</sub> | linear peptide dimer |                                   |       |                |
| Gly-Cys-R                 | -                                 | 64                        | 5                               | -                                       | -                                                    | -                    | 30 <sup>f</sup>                   | -     |                |
| Ala-Cys-R                 | -                                 | 49, 40                    | -                               | -                                       | -                                                    | -                    | 9 <sup>f</sup> , 2 <sup>f</sup>   | -     |                |
| D-Ala-Cys-R               | -                                 | 63, 20                    | 5                               | -                                       | -                                                    | -                    | 12 <sup>f</sup>                   | -     |                |
| Val-Cys-R                 | -                                 | 51, 33                    | -                               | -                                       | -                                                    | -                    | 16 <sup>f</sup>                   | -     |                |
| β-Ala-Cys-R               | -                                 | 82                        | -                               | -                                       | -                                                    | -                    | 18 <sup>f</sup>                   | -     |                |
| Pro-Cys-R                 | -                                 | 8, 5                      | -                               | -                                       | -                                                    | -                    | 70 <sup>f</sup> , 11 <sup>g</sup> | 6     |                |
| Phe-Cys-R                 | -                                 | 29, 19                    | 6                               | -                                       | -                                                    | -                    | 5 <sup>b</sup> , 4 <sup>f</sup>   | 36    |                |
| Thr-Cys-R                 | -                                 | 60, 21                    | 8                               | -                                       | -                                                    | -                    | 11 <sup>f</sup>                   | -     |                |
| Asn-Cys-R                 | -                                 | 75                        | 16                              | -                                       | -                                                    | -                    | 9 <sup>f</sup>                    | -     |                |
| Met-Cys-R                 | -                                 | 49, 30                    | 11                              | -                                       | -                                                    | -                    | 10 <sup>f</sup>                   | -     |                |
| Tyr-Cys-R                 | -                                 | 44, 35                    | -                               | -                                       | -                                                    | -                    | -                                 | 22    |                |
| Glu-Cys-R                 | -                                 | 62, 27                    | -                               | -                                       | -                                                    | -                    | 11 <sup>f</sup>                   | -     |                |
| Gly-HCys-R <sub>1</sub>   | -                                 | 43, 41                    | -                               | -                                       | -                                                    | -                    | 13 <sup>f</sup>                   | 3     |                |
| Gly-Mnv- R <sub>1</sub>   | -                                 | 37, 13                    | -                               | -                                       | -                                                    | -                    | 9 <sup>f</sup>                    | 41    |                |
| Gly-NMeCys-R <sub>1</sub> | -                                 | 90                        | 3                               | -                                       | -                                                    | -                    | -                                 | 4, 2  |                |
| (Gly) <sub>2</sub> -Cys-R | -                                 | 48, 37                    | -                               | -                                       | -                                                    | -                    | 15 <sup>f</sup>                   | -     |                |
| (Gly) <sub>3</sub> -Cys-R | -                                 | 54                        | 13                              | -                                       | -                                                    | -                    | 32 <sup>f</sup>                   | -     |                |
| (Gly) <sub>4</sub> -Cys-R | -                                 | 76                        | -                               | -                                       | -                                                    | -                    | 24 <sup>f</sup>                   | -     |                |
| (Gly) <sub>5</sub> -Cys-R | -                                 | 56, 26                    | -                               | -                                       | -                                                    | -                    | 18 <sup>f</sup>                   | -     |                |

LC-MS analysis of Gly-Cys-R macrocyclization:

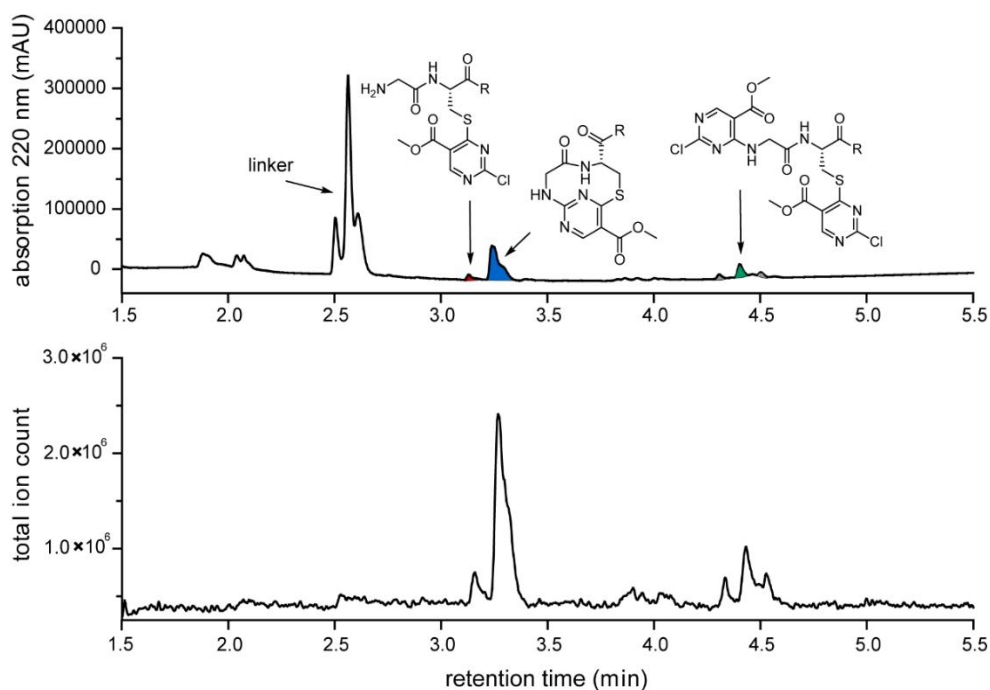

## Dichloroacetone (11)

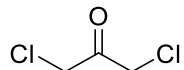

| peptide                   | substrate | product | side products        |                |                                 |                                         |                                                      | not identified          |
|---------------------------|-----------|---------|----------------------|----------------|---------------------------------|-----------------------------------------|------------------------------------------------------|-------------------------|
|                           |           |         | not modified peptide | cyclic peptide | linear peptide-linker conjugate | linear peptide-linker conjugate with OH | linear peptide-linker conjugate with NH <sub>2</sub> |                         |
| Gly-Cys-R                 | -         | 9       | -                    | 13             | 16                              | 11                                      | -                                                    | 13, 9, 8, 6, 7, 6, 2    |
| Ala-Cys-R                 | -         | 19      | -                    | 13             | 26                              | 8                                       | -                                                    | 12, 10, 7, 5            |
| D-Ala-Cys-R               | -         | 19      | -                    | 22             | 39                              | 12                                      | -                                                    | 8                       |
| Val-Cys-R                 | -         | 8       | -                    | 20             | 40                              | 7                                       | -                                                    | 7, 6, 6, 6              |
| β-Ala-Cys-R               | -         | 21      | -                    | 13             | 22                              | 8                                       | -                                                    | 21, 8, 6, 1             |
| Pro-Cys-R                 | -         | 10      | -                    | 21             | 47                              | 3                                       | -                                                    | 10, 7, 2                |
| Phe-Cys-R                 | -         | 18      | -                    | 12             | 20                              | 15                                      | -                                                    | 12, 8, 6, 4, 3, 2       |
| Thr-Cys-R                 | -         | 17      | -                    | 9              | 26                              | 11                                      | -                                                    | 13, 10, 9, 5            |
| Asn-Cys-R                 | -         | 23      | -                    | 23             | 19                              | 16                                      | -                                                    | 8, 6, 5                 |
| Met-Cys-R                 | -         | -       | -                    | 4              | -                               | 7                                       | 89 <sup>e</sup>                                      | -                       |
| Tyr-Cys-R                 | -         | 69      | -                    | -              | -                               | 16                                      | -                                                    | 15                      |
| Glu-Cys-R                 | -         | 18      | -                    | 7              | 19                              | 12                                      | -                                                    | 12, 9, 8, 4, 4, 3, 3    |
| Gly-HCys-R <sub>1</sub>   | -         | 47      | -                    | 10             | -                               | 16                                      | -                                                    | 14, 4, 4, 3, 3          |
| Gly-Mnv-R <sub>1</sub>    | -         | 30      | -                    | -              | -                               | 5                                       | -                                                    | 20, 14, 12, 10, 3, 3, 3 |
| Gly-NMeCys-R <sub>1</sub> | -         | 6       | -                    | 19             | -                               | 6                                       | -                                                    | 52, 10, 3, 2, 1         |
| (Gly) <sub>2</sub> -Cys-R | -         | 33      | -                    | 12             | -                               | 3                                       | -                                                    | 27, 22, 3               |
| (Gly) <sub>3</sub> -Cys-R | -         | 29      | -                    | 8              | 15                              | 12                                      | -                                                    | 19, 15, 2               |
| (Gly) <sub>4</sub> -Cys-R | -         | 30      | -                    | 6              | 11                              | 4                                       | -                                                    | 24, 23, 2               |
| (Gly) <sub>5</sub> -Cys-R | -         | 25      | -                    | 6              | 17                              | 6                                       | -                                                    | 22, 22, 2               |

LC-MS analysis of Gly-Cys-R<sub>1</sub> macrocyclization:

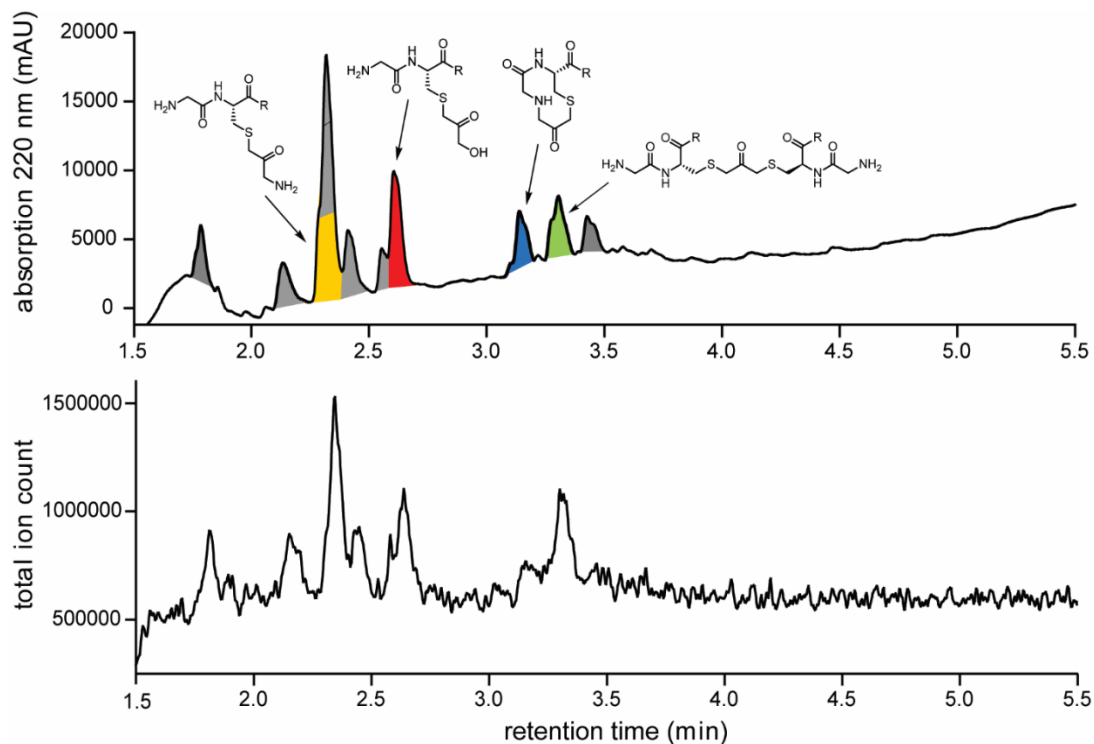

## Dibromoacetone (12)

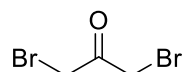

| peptide                   | substrate | product | side products                   |                                         |                                                      |                      |                                  | not identified |
|---------------------------|-----------|---------|---------------------------------|-----------------------------------------|------------------------------------------------------|----------------------|----------------------------------|----------------|
|                           |           |         | linear peptide-linker conjugate | linear peptide-linker conjugate with OH | linear peptide-linker conjugate with NH <sub>2</sub> | linear peptide dimer | other                            |                |
| Gly-Cys-R                 | -         | 10      | -                               | 22                                      | 13                                                   | 11                   | 3 <sup>b</sup>                   | 15, 8, 7, 6, 5 |
| Ala-Cys-R                 | -         | 7       | -                               | 21                                      | 15                                                   | 27                   | 10 <sup>b</sup>                  | 15, 4          |
| D-Ala-Cys-R               | -         | 5       | -                               | 24                                      | 24                                                   | 12                   | 21 <sup>b</sup>                  | 15             |
| Val-Cys-R                 | -         | 5       | -                               | 22                                      | 20                                                   | 10                   | 7 <sup>b</sup>                   | 20, 6, 5, 4    |
| β-Ala-Cys-R               | -         | 42      | -                               | 10                                      | 15                                                   | -                    | 12 <sup>b</sup>                  | 18, 3          |
| Pro-Cys-R                 | -         | 5       | -                               | 26                                      | 26                                                   | -                    | 24 <sup>b</sup>                  | 11, 4, 3       |
| Phe-Cys-R                 | -         | 16      | -                               | 13                                      | 13                                                   | 17                   | 17 <sup>b</sup>                  | 10, 6, 6, 2    |
| Thr-Cys-R                 | -         | 3       | -                               | 12                                      | 12                                                   | 21                   | 21 <sup>b</sup>                  | 21, 9          |
| Asn-Cys-R                 | -         | 26      | -                               | 23                                      | 15                                                   | 5                    | 5 <sup>b</sup>                   | 15, 11         |
| Met-Cys-R                 | -         | -       | -                               | 8                                       | 8                                                    | 7                    | 7 <sup>b</sup> , 46 <sup>c</sup> | 12, 12         |
| Tyr-Cys-R                 | -         | 36      | -                               | 4                                       | 4                                                    | -                    | -                                | 49, 6          |
| Glu-Cys-R                 | -         | 21      | -                               | 14                                      | 14                                                   | 17                   | 17 <sup>b</sup>                  | 7, 4, 3, 3     |
| Gly-HCys-R <sub>1</sub>   | N.D.      | N.D.    | N.D.                            | N.D.                                    | N.D.                                                 | N.D.                 | N.D.                             | N.D.           |
| Gly-Mnv-R <sub>1</sub>    | N.D.      | N.D.    | N.D.                            | N.D.                                    | N.D.                                                 | N.D.                 | N.D.                             | N.D.           |
| Gly-NMeCys-R <sub>1</sub> | N.D.      | N.D.    | N.D.                            | N.D.                                    | N.D.                                                 | N.D.                 | N.D.                             | N.D.           |
| (Gly) <sub>2</sub> -Cys-R | -         | 38      | -                               | 37                                      | -                                                    | 3                    | 8 <sup>b</sup>                   | 14             |
| (Gly) <sub>3</sub> -Cys-R | -         | 16      | -                               | 16                                      | -                                                    | 7                    | 7 <sup>b</sup>                   | 46, 6          |
| (Gly) <sub>4</sub> -Cys-R | -         | 43      | -                               | 7                                       | -                                                    | -                    | -                                | 27, 23         |
| (Gly) <sub>5</sub> -Cys-R | -         | 38      | -                               | 20                                      | -                                                    | -                    | -                                | 16, 15, 9, 2   |

LC-MS analysis of Gly-Cys-R macrocyclization:

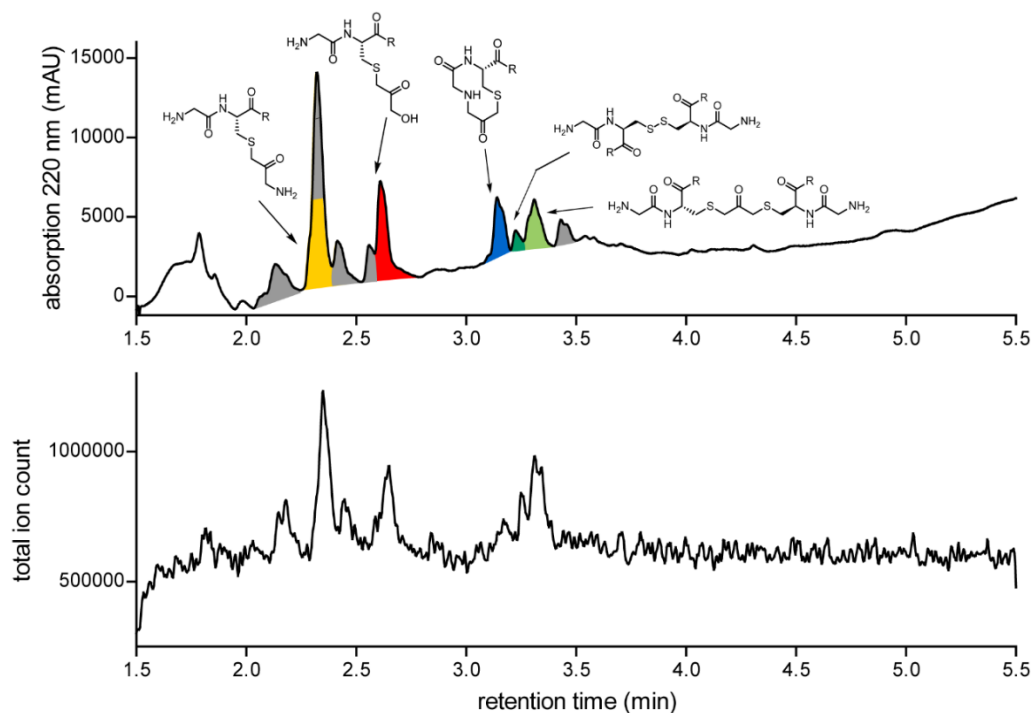

**trans-1,4-dibromo-2-butene (13)**

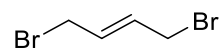

| peptide                   | substrate | product | side products                   |                                         |                                                      |                      |                |                |
|---------------------------|-----------|---------|---------------------------------|-----------------------------------------|------------------------------------------------------|----------------------|----------------|----------------|
|                           |           |         | linear peptide-linker conjugate | linear peptide-linker conjugate with OH | linear peptide-linker conjugate with NH <sub>2</sub> | linear peptide dimer | other          | not identified |
| Gly-Cys-R <sub>1</sub>    | -         | 14      | -                               | 63                                      | -                                                    | 4                    | 3 <sup>c</sup> | 12, 4          |
| Ala-Cys-R                 | N.D.      | N.D.    | N.D.                            | N.D.                                    | N.D.                                                 | N.D.                 | N.D.           | N.D.           |
| D-Ala-Cys-R               | N.D.      | N.D.    | N.D.                            | N.D.                                    | N.D.                                                 | N.D.                 | N.D.           | N.D.           |
| Val-Cys-R                 | N.D.      | N.D.    | N.D.                            | N.D.                                    | N.D.                                                 | N.D.                 | N.D.           | N.D.           |
| β-Ala-Cys-R               | N.D.      | N.D.    | N.D.                            | N.D.                                    | N.D.                                                 | N.D.                 | N.D.           | N.D.           |
| Pro-Cys-R                 | N.D.      | N.D.    | N.D.                            | N.D.                                    | N.D.                                                 | N.D.                 | N.D.           | N.D.           |
| Phe-Cys-R                 | N.D.      | N.D.    | N.D.                            | N.D.                                    | N.D.                                                 | N.D.                 | N.D.           | N.D.           |
| Thr-Cys-R                 | N.D.      | N.D.    | N.D.                            | N.D.                                    | N.D.                                                 | N.D.                 | N.D.           | N.D.           |
| Asn-Cys-R                 | N.D.      | N.D.    | N.D.                            | N.D.                                    | N.D.                                                 | N.D.                 | N.D.           | N.D.           |
| Met-Cys-R                 | N.D.      | N.D.    | N.D.                            | N.D.                                    | N.D.                                                 | N.D.                 | N.D.           | N.D.           |
| Tyr-Cys-R                 | N.D.      | N.D.    | N.D.                            | N.D.                                    | N.D.                                                 | N.D.                 | N.D.           | N.D.           |
| Glu-Cys-R                 | N.D.      | N.D.    | N.D.                            | N.D.                                    | N.D.                                                 | N.D.                 | N.D.           | N.D.           |
| Gly-HCys-R <sub>1</sub>   | -         | 82      | -                               | 11                                      | -                                                    | -                    | -              | 7              |
| Gly-Mnv-R <sub>1</sub>    | -         | 8       | -                               | 88                                      | -                                                    | -                    | -              | 4              |
| Gly-NMeCys-R <sub>1</sub> | -         | 17      | -                               | 79                                      | -                                                    | 4                    | -              | -              |
| (Gly) <sub>2</sub> -Cys-R | N.D.      | N.D.    | N.D.                            | N.D.                                    | N.D.                                                 | N.D.                 | N.D.           | N.D.           |
| (Gly) <sub>3</sub> -Cys-R | N.D.      | N.D.    | N.D.                            | N.D.                                    | N.D.                                                 | N.D.                 | N.D.           | N.D.           |
| (Gly) <sub>4</sub> -Cys-R | N.D.      | N.D.    | N.D.                            | N.D.                                    | N.D.                                                 | N.D.                 | N.D.           | N.D.           |
| (Gly) <sub>5</sub> -Cys-R | N.D.      | N.D.    | N.D.                            | N.D.                                    | N.D.                                                 | N.D.                 | N.D.           | N.D.           |

LC-MS analysis of Gly-Cys-R<sub>1</sub> macrocyclization:

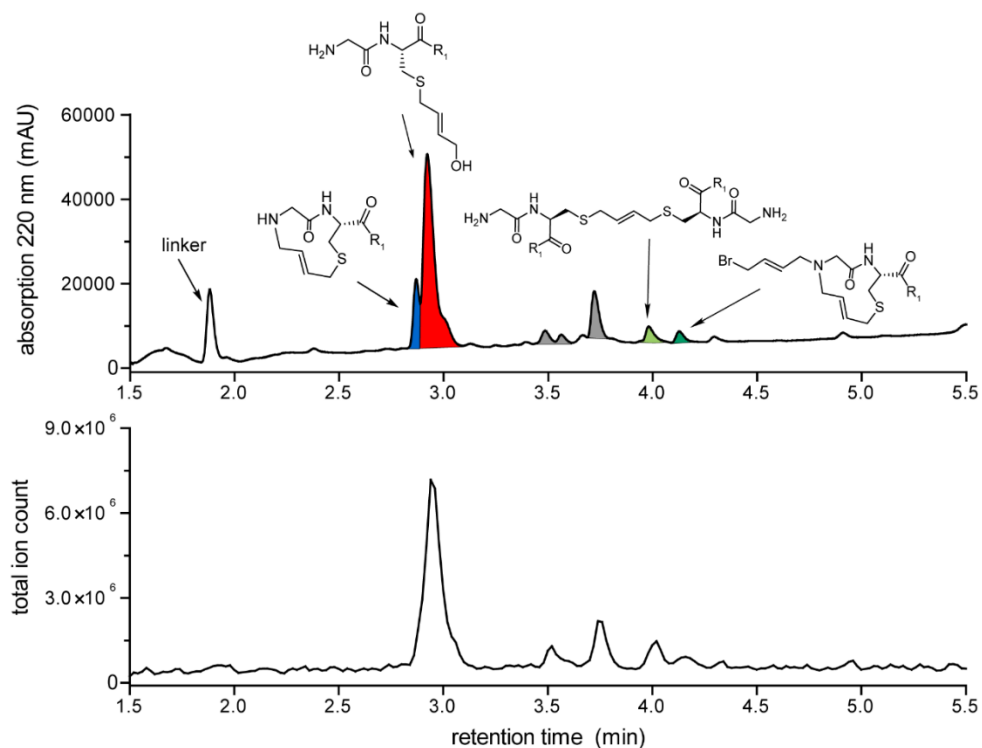

### 1,3-bis(bromoacetyl)benzene (14)

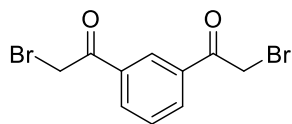

| peptide                   | substrate<br>not modified peptide | product<br>cyclic peptide | side products                   |                                         |                                                      |                      |       |                |
|---------------------------|-----------------------------------|---------------------------|---------------------------------|-----------------------------------------|------------------------------------------------------|----------------------|-------|----------------|
|                           |                                   |                           | linear peptide-linker conjugate | linear peptide-linker conjugate with OH | linear peptide-linker conjugate with NH <sub>2</sub> | linear peptide dimer | other | not identified |
| Gly-Cys-R <sub>1</sub>    | -                                 | 51                        | -                               | 9                                       | -                                                    | 40                   | -     | -              |
| Ala-Cys-R                 | N.D.                              | N.D.                      | N.D.                            | N.D.                                    | N.D.                                                 | N.D.                 | N.D.  | N.D.           |
| D-Ala-Cys-R               | N.D.                              | N.D.                      | N.D.                            | N.D.                                    | N.D.                                                 | N.D.                 | N.D.  | N.D.           |
| Val-Cys-R                 | N.D.                              | N.D.                      | N.D.                            | N.D.                                    | N.D.                                                 | N.D.                 | N.D.  | N.D.           |
| β-Ala-Cys-R               | N.D.                              | N.D.                      | N.D.                            | N.D.                                    | N.D.                                                 | N.D.                 | N.D.  | N.D.           |
| Pro-Cys-R                 | N.D.                              | N.D.                      | N.D.                            | N.D.                                    | N.D.                                                 | N.D.                 | N.D.  | N.D.           |
| Phe-Cys-R                 | N.D.                              | N.D.                      | N.D.                            | N.D.                                    | N.D.                                                 | N.D.                 | N.D.  | N.D.           |
| Thr-Cys-R                 | N.D.                              | N.D.                      | N.D.                            | N.D.                                    | N.D.                                                 | N.D.                 | N.D.  | N.D.           |
| Asn-Cys-R                 | N.D.                              | N.D.                      | N.D.                            | N.D.                                    | N.D.                                                 | N.D.                 | N.D.  | N.D.           |
| Met-Cys-R                 | N.D.                              | N.D.                      | N.D.                            | N.D.                                    | N.D.                                                 | N.D.                 | N.D.  | N.D.           |
| Tyr-Cys-R                 | N.D.                              | N.D.                      | N.D.                            | N.D.                                    | N.D.                                                 | N.D.                 | N.D.  | N.D.           |
| Glu-Cys-R                 | N.D.                              | N.D.                      | N.D.                            | N.D.                                    | N.D.                                                 | N.D.                 | N.D.  | N.D.           |
| Gly-HCys-R <sub>1</sub>   | -                                 | 5                         | -                               | 17                                      | -                                                    | 67                   | -     | 11             |
| Gly-Mnv-R <sub>1</sub>    | -                                 | 70                        | -                               | 8                                       | -                                                    | 22                   | -     | -              |
| Gly-NMeCys-R <sub>1</sub> | -                                 | 83                        | -                               | -                                       | -                                                    | 17                   | -     | -              |
| (Gly) <sub>2</sub> -Cys-R | N.D.                              | N.D.                      | N.D.                            | N.D.                                    | N.D.                                                 | N.D.                 | N.D.  | N.D.           |
| (Gly) <sub>3</sub> -Cys-R | N.D.                              | N.D.                      | N.D.                            | N.D.                                    | N.D.                                                 | N.D.                 | N.D.  | N.D.           |
| (Gly) <sub>4</sub> -Cys-R | N.D.                              | N.D.                      | N.D.                            | N.D.                                    | N.D.                                                 | N.D.                 | N.D.  | N.D.           |
| (Gly) <sub>5</sub> -Cys-R | N.D.                              | N.D.                      | N.D.                            | N.D.                                    | N.D.                                                 | N.D.                 | N.D.  | N.D.           |

LC-MS analysis of Gly-Cys-R<sub>1</sub> macrocyclization:

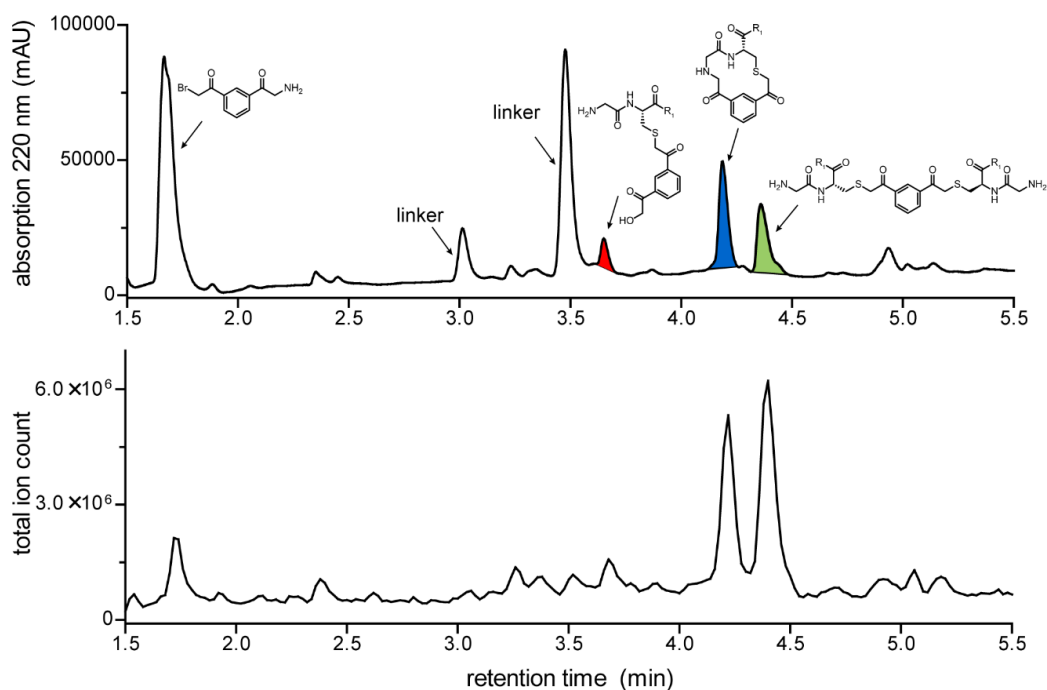

## 1,4-bis(bromoacetyl)benzene (15)

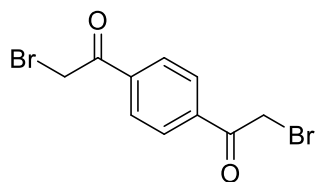

| peptide                   | substrate | product | side products                   |                                         |                                                      |                      |                                 |                |
|---------------------------|-----------|---------|---------------------------------|-----------------------------------------|------------------------------------------------------|----------------------|---------------------------------|----------------|
|                           |           |         | linear peptide-linker conjugate | linear peptide-linker conjugate with OH | linear peptide-linker conjugate with NH <sub>2</sub> | linear peptide dimer | other                           | not identified |
| Gly-Cys-R <sub>1</sub>    | -         | -       | 10                              | 48                                      | -                                                    | 38                   | -                               | 4              |
| Ala-Cys-R                 | N.D.      | N.D.    | N.D.                            | N.D.                                    | N.D.                                                 | N.D.                 | N.D.                            | N.D.           |
| D-Ala-Cys-R               | N.D.      | N.D.    | N.D.                            | N.D.                                    | N.D.                                                 | N.D.                 | N.D.                            | N.D.           |
| Val-Cys-R                 | N.D.      | N.D.    | N.D.                            | N.D.                                    | N.D.                                                 | N.D.                 | N.D.                            | N.D.           |
| β-Ala-Cys-R               | N.D.      | N.D.    | N.D.                            | N.D.                                    | N.D.                                                 | N.D.                 | N.D.                            | N.D.           |
| Pro-Cys-R                 | N.D.      | N.D.    | N.D.                            | N.D.                                    | N.D.                                                 | N.D.                 | N.D.                            | N.D.           |
| Phe-Cys-R                 | N.D.      | N.D.    | N.D.                            | N.D.                                    | N.D.                                                 | N.D.                 | N.D.                            | N.D.           |
| Thr-Cys-R                 | N.D.      | N.D.    | N.D.                            | N.D.                                    | N.D.                                                 | N.D.                 | N.D.                            | N.D.           |
| Asn-Cys-R                 | N.D.      | N.D.    | N.D.                            | N.D.                                    | N.D.                                                 | N.D.                 | N.D.                            | N.D.           |
| Met-Cys-R                 | N.D.      | N.D.    | N.D.                            | N.D.                                    | N.D.                                                 | N.D.                 | N.D.                            | N.D.           |
| Tyr-Cys-R                 | N.D.      | N.D.    | N.D.                            | N.D.                                    | N.D.                                                 | N.D.                 | N.D.                            | N.D.           |
| Glu-Cys-R                 | N.D.      | N.D.    | N.D.                            | N.D.                                    | N.D.                                                 | N.D.                 | N.D.                            | N.D.           |
| Gly-HCys-R <sub>1</sub>   | -         | -       | -                               | 41                                      | -                                                    | 48                   | -                               | 11             |
| Gly-Mnv-R <sub>1</sub>    | -         | 26      | -                               | 8                                       | -                                                    | 66                   | -                               | -              |
| Gly-NMeCys-R <sub>1</sub> | 10        | -       | 25                              | 18                                      | -                                                    | 21                   | 5 <sup>c</sup> , 3 <sup>b</sup> | 12, 6          |
| (Gly) <sub>2</sub> -Cys-R | N.D.      | N.D.    | N.D.                            | N.D.                                    | N.D.                                                 | N.D.                 | N.D.                            | N.D.           |
| (Gly) <sub>3</sub> -Cys-R | N.D.      | N.D.    | N.D.                            | N.D.                                    | N.D.                                                 | N.D.                 | N.D.                            | N.D.           |
| (Gly) <sub>4</sub> -Cys-R | N.D.      | N.D.    | N.D.                            | N.D.                                    | N.D.                                                 | N.D.                 | N.D.                            | N.D.           |
| (Gly) <sub>5</sub> -Cys-R | N.D.      | N.D.    | N.D.                            | N.D.                                    | N.D.                                                 | N.D.                 | N.D.                            | N.D.           |

LC-MS analysis of Gly-Cys-R<sub>1</sub> macrocyclization:

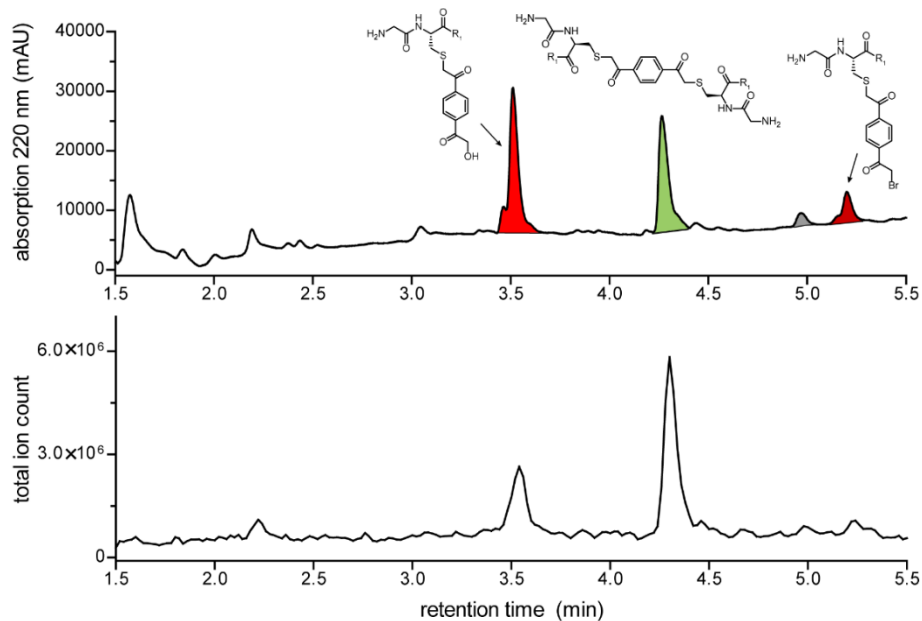



## 4,6-difluoropyrimidine (16)

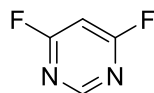

| peptide                   | substrate | product | side products                   |                                         |                                                      |                      |                 | other        | not identified |
|---------------------------|-----------|---------|---------------------------------|-----------------------------------------|------------------------------------------------------|----------------------|-----------------|--------------|----------------|
|                           |           |         | linear peptide-linker conjugate | linear peptide-linker conjugate with OH | linear peptide-linker conjugate with NH <sub>2</sub> | linear peptide dimer |                 |              |                |
| Gly-Cys-R <sub>1</sub>    | -         | 6       | 70                              | -                                       | -                                                    | -                    | 19 <sup>c</sup> | 4            |                |
| Ala-Cys-R                 | N.D.      | N.D.    | N.D.                            | N.D.                                    | N.D.                                                 | N.D.                 | N.D.            | N.D.         |                |
| D-Ala-Cys-R               | N.D.      | N.D.    | N.D.                            | N.D.                                    | N.D.                                                 | N.D.                 | N.D.            | N.D.         |                |
| Val-Cys-R                 | N.D.      | N.D.    | N.D.                            | N.D.                                    | N.D.                                                 | N.D.                 | N.D.            | N.D.         |                |
| β-Ala-Cys-R               | N.D.      | N.D.    | N.D.                            | N.D.                                    | N.D.                                                 | N.D.                 | N.D.            | N.D.         |                |
| Pro-Cys-R                 | N.D.      | N.D.    | N.D.                            | N.D.                                    | N.D.                                                 | N.D.                 | N.D.            | N.D.         |                |
| Phe-Cys-R                 | N.D.      | N.D.    | N.D.                            | N.D.                                    | N.D.                                                 | N.D.                 | N.D.            | N.D.         |                |
| Thr-Cys-R                 | N.D.      | N.D.    | N.D.                            | N.D.                                    | N.D.                                                 | N.D.                 | N.D.            | N.D.         |                |
| Asn-Cys-R                 | N.D.      | N.D.    | N.D.                            | N.D.                                    | N.D.                                                 | N.D.                 | N.D.            | N.D.         |                |
| Met-Cys-R                 | N.D.      | N.D.    | N.D.                            | N.D.                                    | N.D.                                                 | N.D.                 | N.D.            | N.D.         |                |
| Tyr-Cys-R                 | N.D.      | N.D.    | N.D.                            | N.D.                                    | N.D.                                                 | N.D.                 | N.D.            | N.D.         |                |
| Glu-Cys-R                 | N.D.      | N.D.    | N.D.                            | N.D.                                    | N.D.                                                 | N.D.                 | N.D.            | N.D.         |                |
| Gly-HCys-R <sub>1</sub>   | 5         | 25      | 36                              | -                                       | -                                                    | -                    | 20 <sup>c</sup> | 10, 4        |                |
| Gly-Mnv-R <sub>1</sub>    | 9         | 6       | 50                              | -                                       | -                                                    | -                    | 17 <sup>c</sup> | 7,4,4,2      |                |
| Gly-NMeCys-R <sub>1</sub> | 36        | -       | 17                              | -                                       | -                                                    | -                    | -               | 28, 11, 5, 2 |                |
| (Gly) <sub>2</sub> -Cys-R | N.D.      | N.D.    | N.D.                            | N.D.                                    | N.D.                                                 | N.D.                 | N.D.            | N.D.         |                |
| (Gly) <sub>3</sub> -Cys-R | N.D.      | N.D.    | N.D.                            | N.D.                                    | N.D.                                                 | N.D.                 | N.D.            | N.D.         |                |
| (Gly) <sub>4</sub> -Cys-R | N.D.      | N.D.    | N.D.                            | N.D.                                    | N.D.                                                 | N.D.                 | N.D.            | N.D.         |                |
| (Gly) <sub>5</sub> -Cys-R | N.D.      | N.D.    | N.D.                            | N.D.                                    | N.D.                                                 | N.D.                 | N.D.            | N.D.         |                |

LC-MS analysis of Gly-Cys-R<sub>1</sub> macrocyclization:

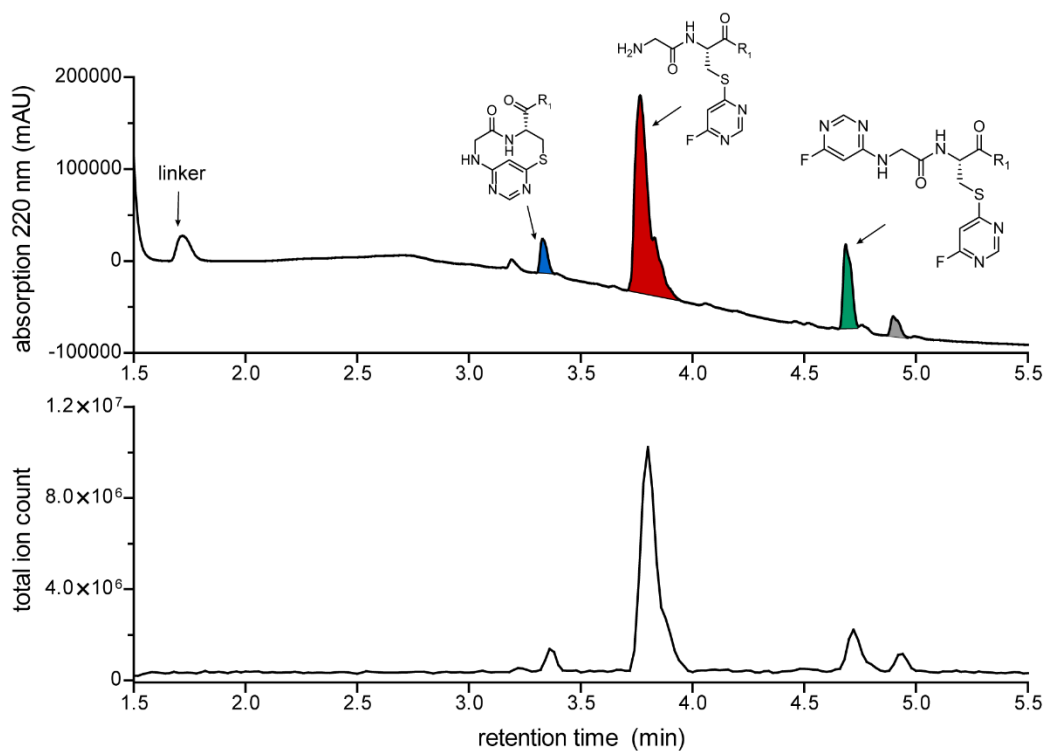

## Color code of side products:

The peaks of frequently found side products are shown in different colors as illustrated with the example of the peptide Gly-Cys-R and the reagent **1** as follows and in fig. S2C.

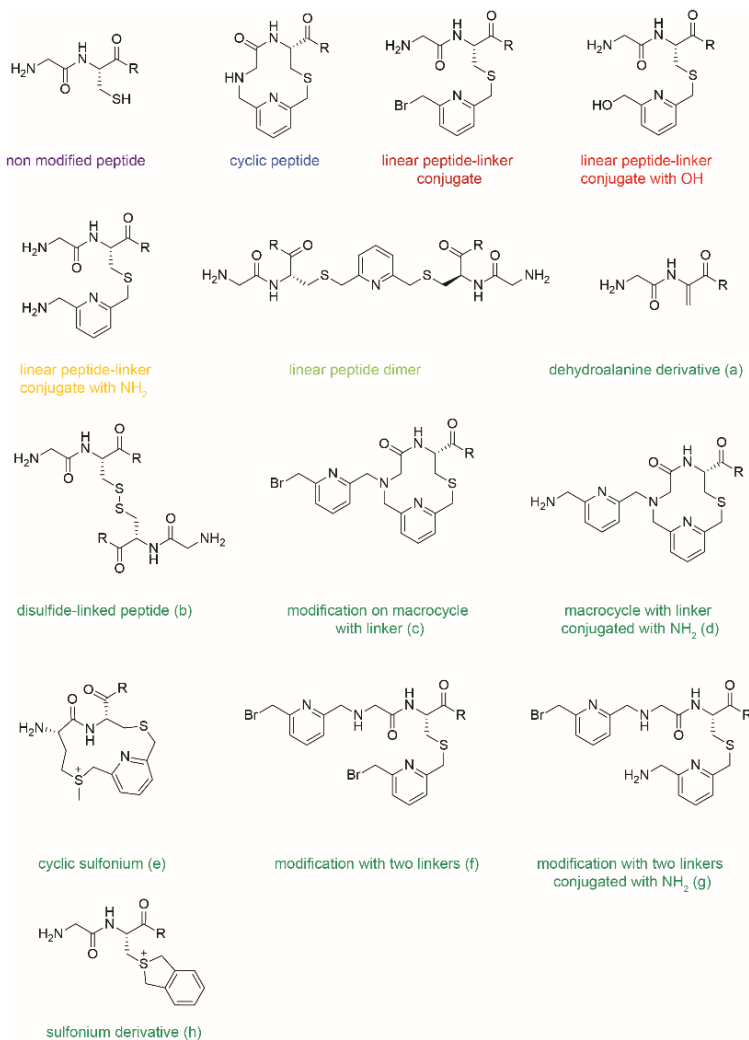

The peaks of less often observed side products are shown in green. They are

- dehydroalanine derivative
- disulfide-linked peptide
- modification with two linkers
- modification with two linkers of which one has reacted with NH<sub>3</sub>
- cyclic sulfonium

The peaks of side products that were not identified but are suspected to contain a peptide moiety (based on the mass) are colored in grey.
