# Supplementary figures and images for: Thiol-to-amine cyclization reaction enables screening of large libraries of macrocyclic compounds and the generation of sub-kilodalton ligands
Source: PubMed Central journal article supplement — Sci Adv. 2019 Aug 21;5(8):eaaw2851. doi: 10.1126/sciadv.aaw2851 (PMC6703864; doi:10.1126/sciadv.aaw2851), 2019-08-21

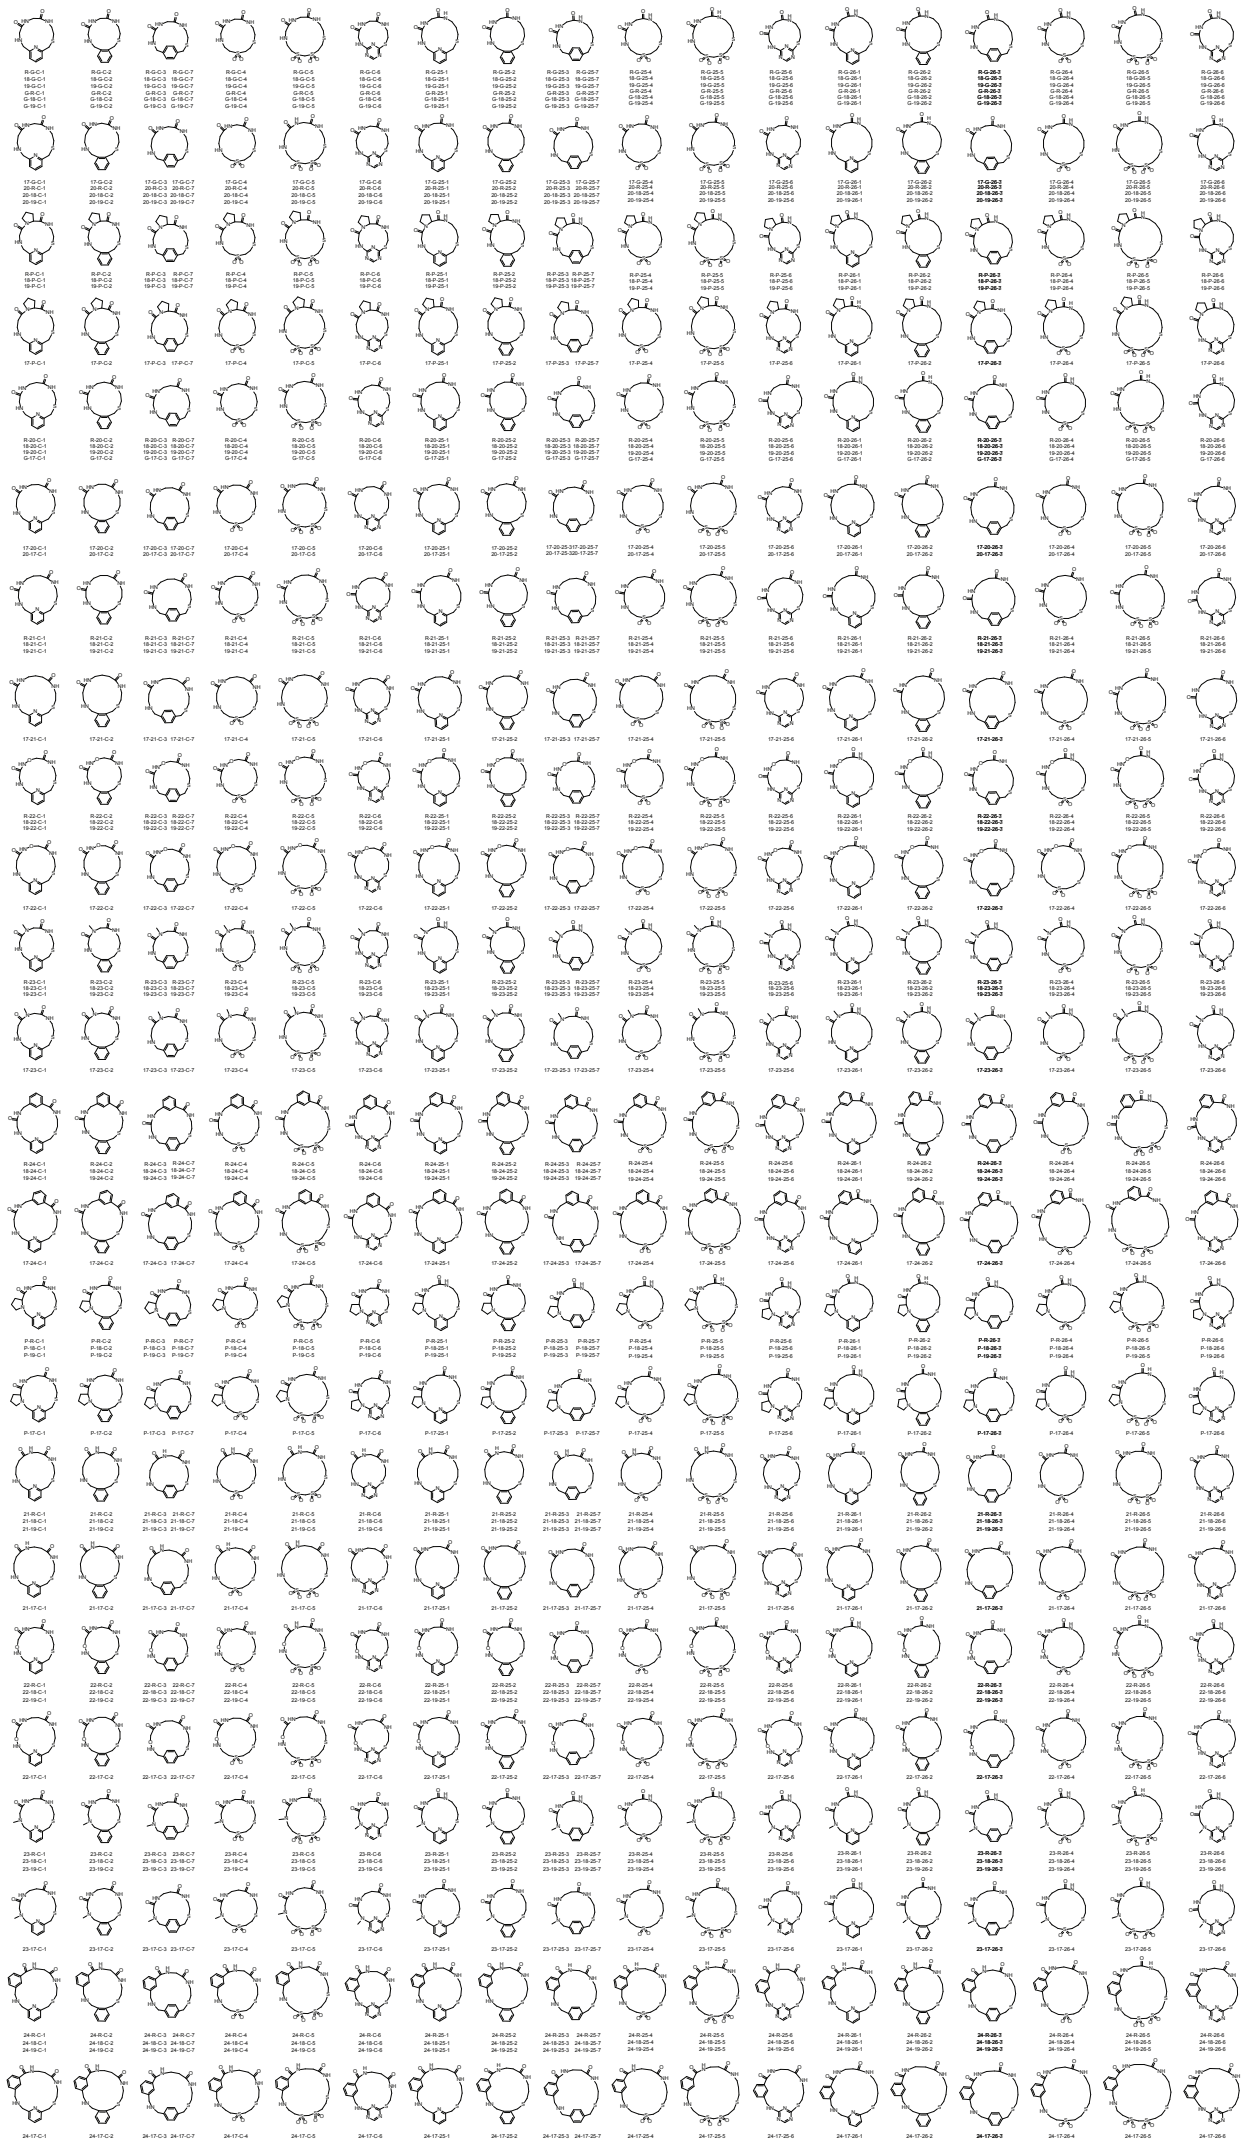

Supplement: aaw2851_Data_S2.pdf [file aaw2851_Data_S2.pdf]
